# Supplementary material
Source: publisher figshare collection journal article supplement (https://sage.figshare.com/ndownloader/files/31300348)
Supplement: Supplementary file 1 [file 31300348]

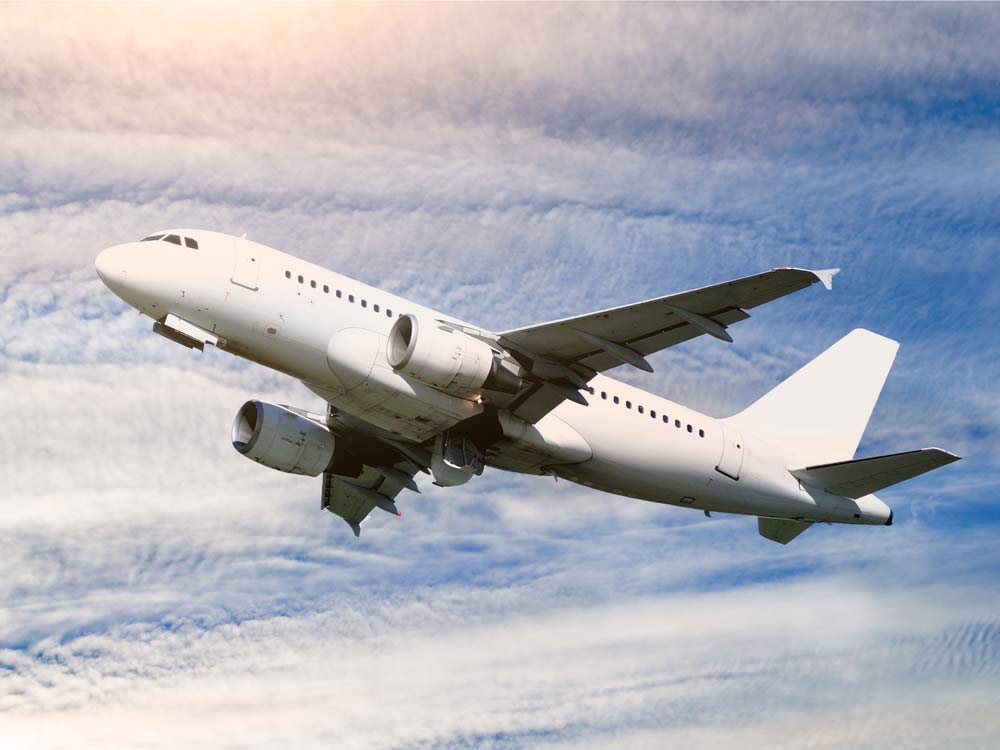


Airplane.jpg


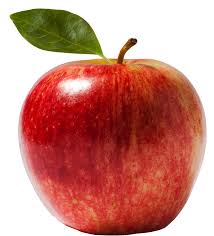


Apple.jpg


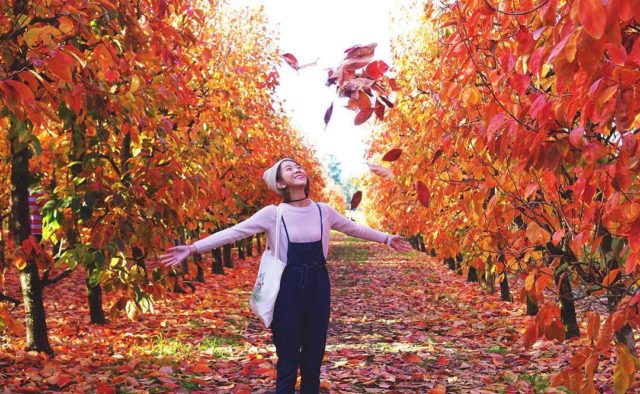


Autumn.jpg


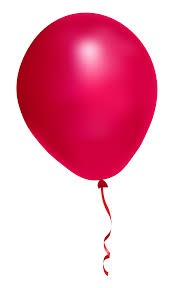


Balloon.jpg


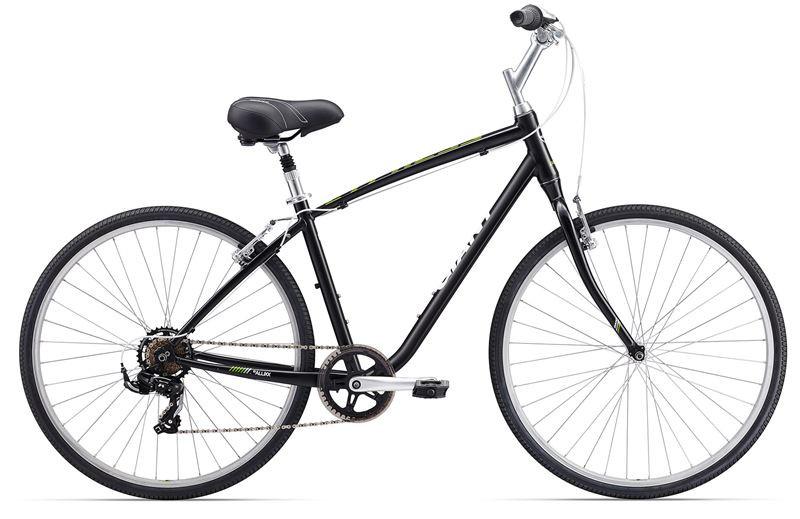


Bicycle.jpg


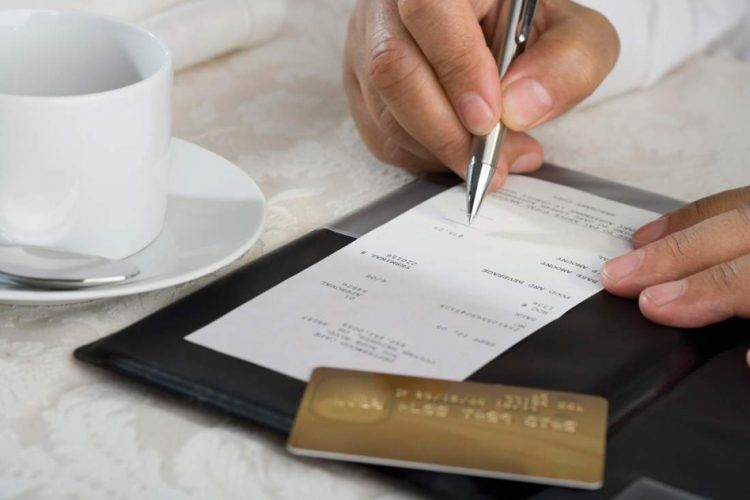


Bill.jpg


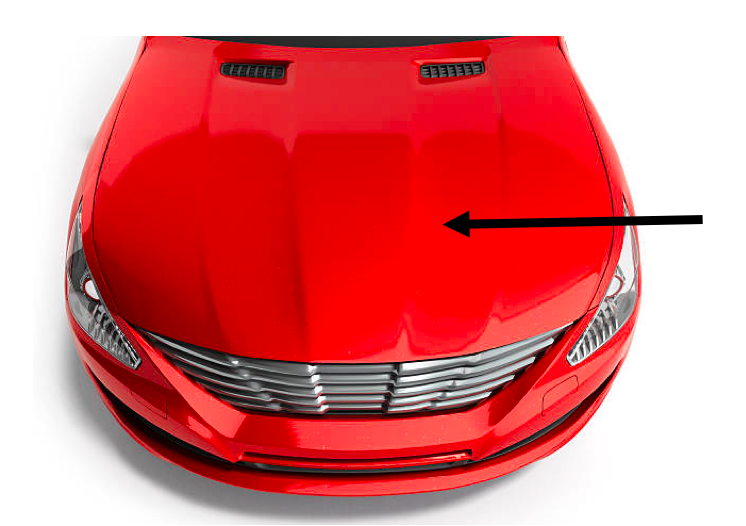


Bonnet.jpg


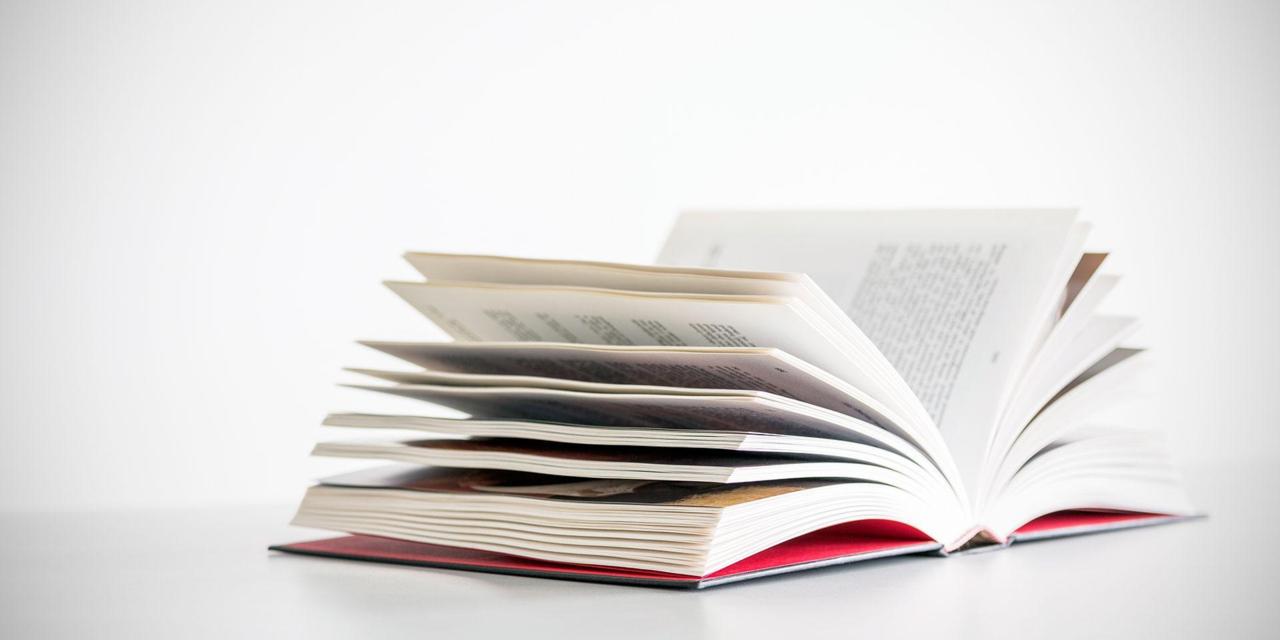


Book.jpg


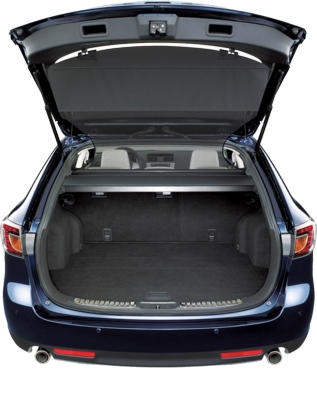


Boot.jpg


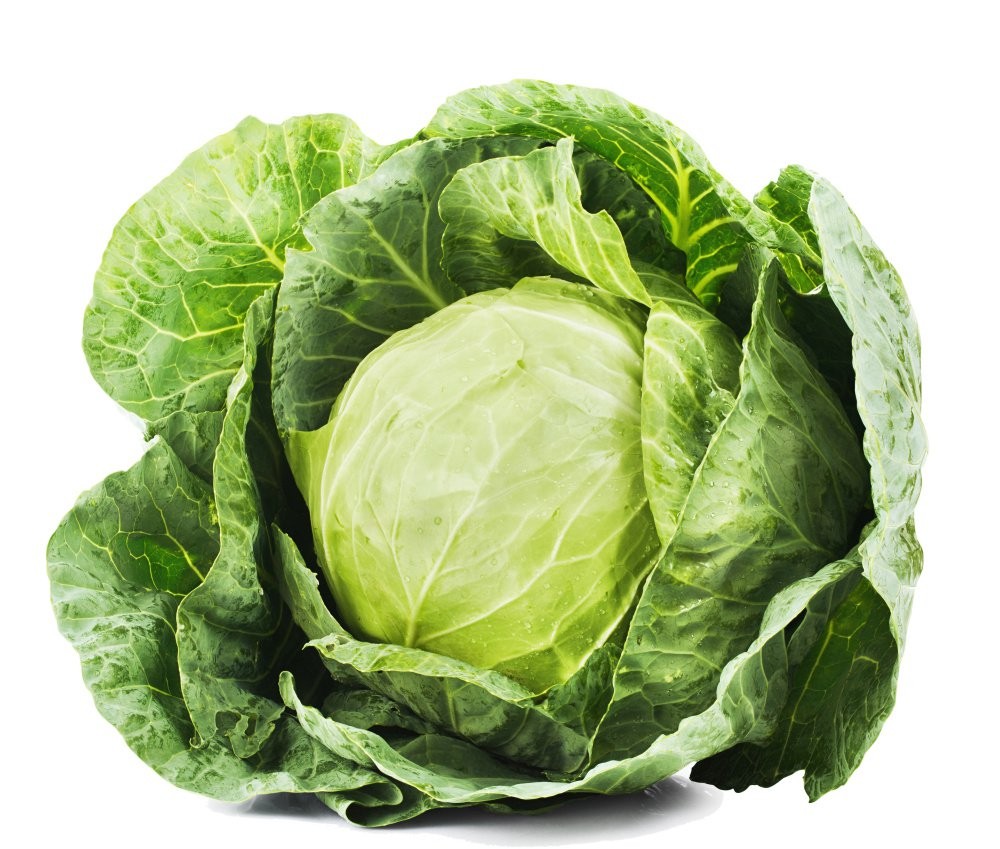


Cabbage.jpg


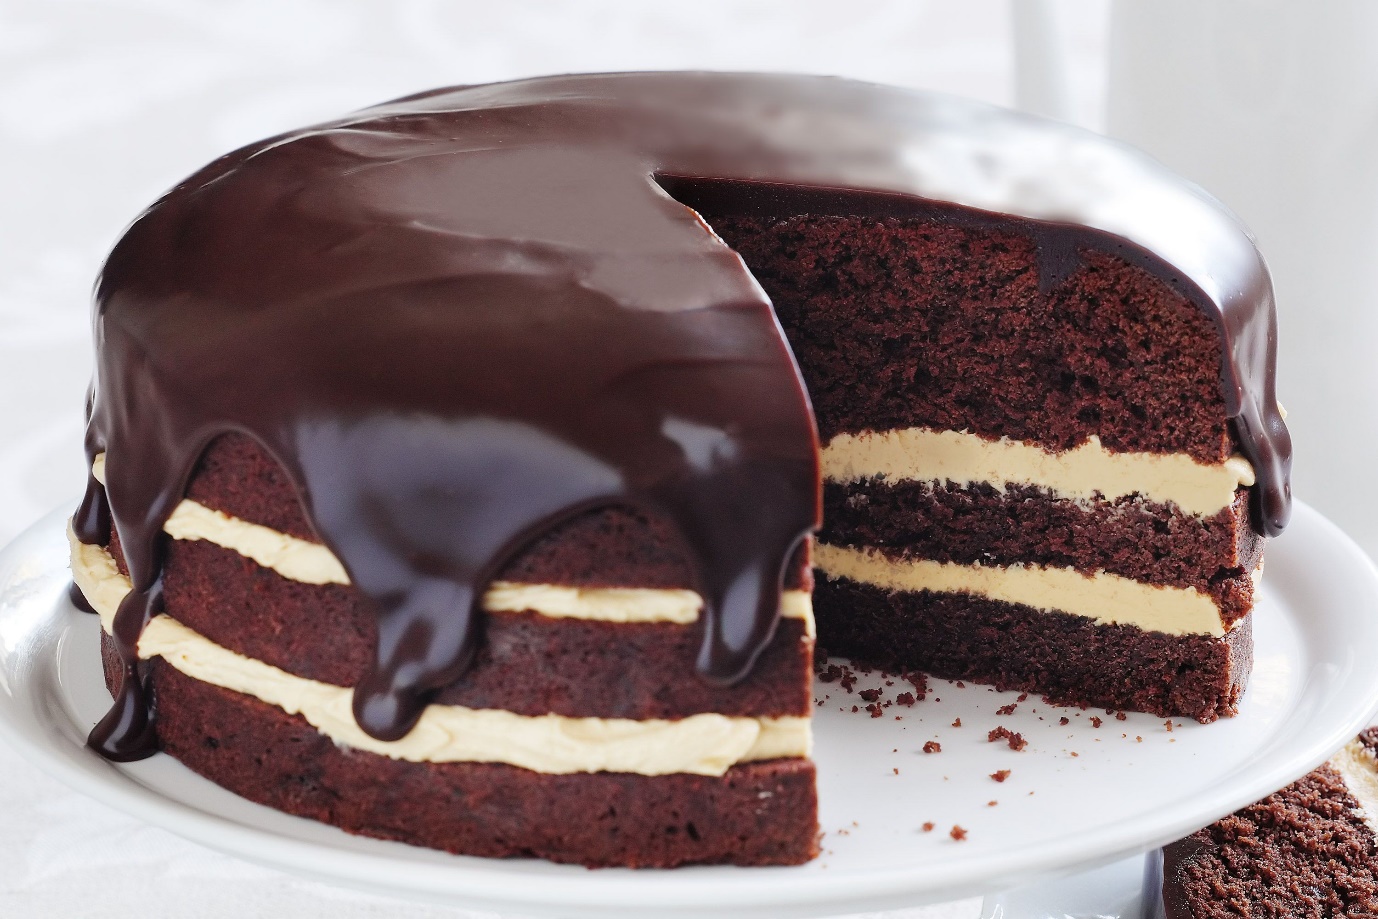


Cake.jpg


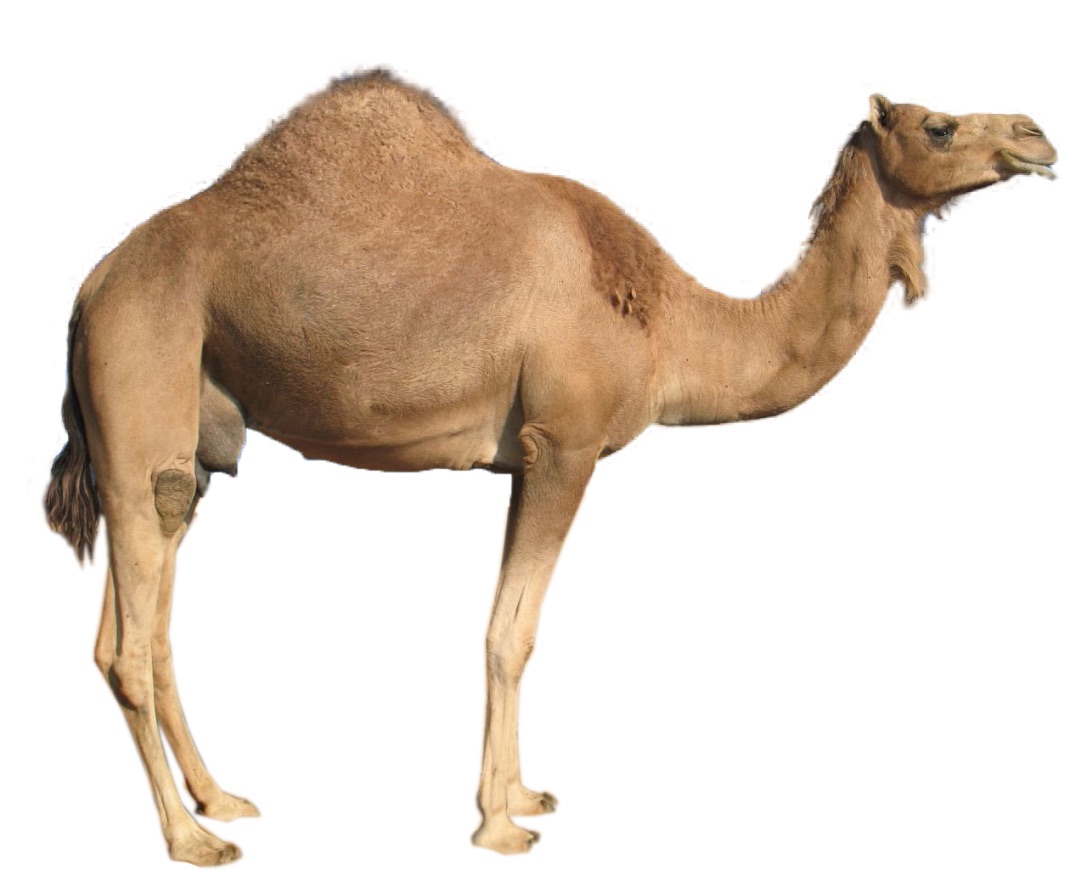


Camel.jpg


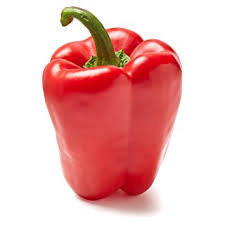


Capsicum.jpg


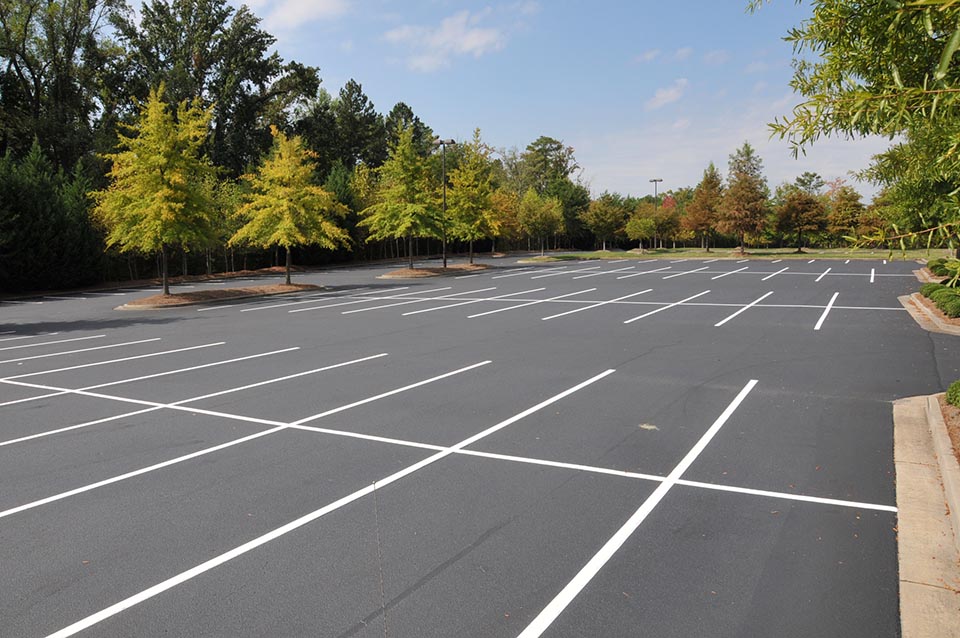


Carpark.jpg


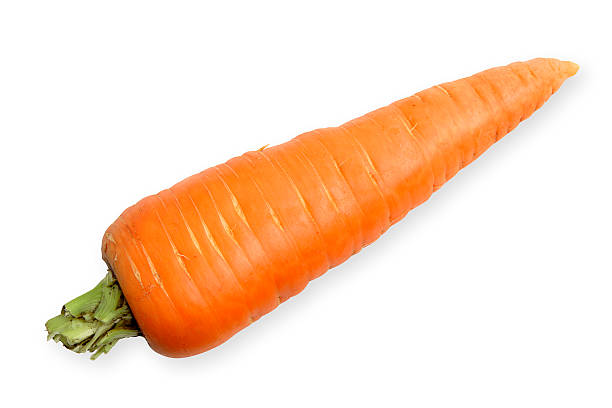


Carrot.jpg


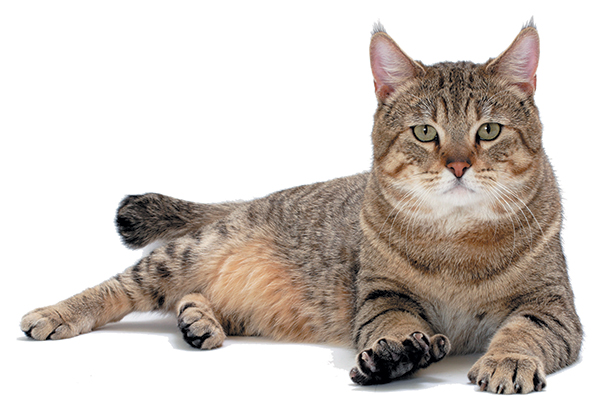


Cat.jpg


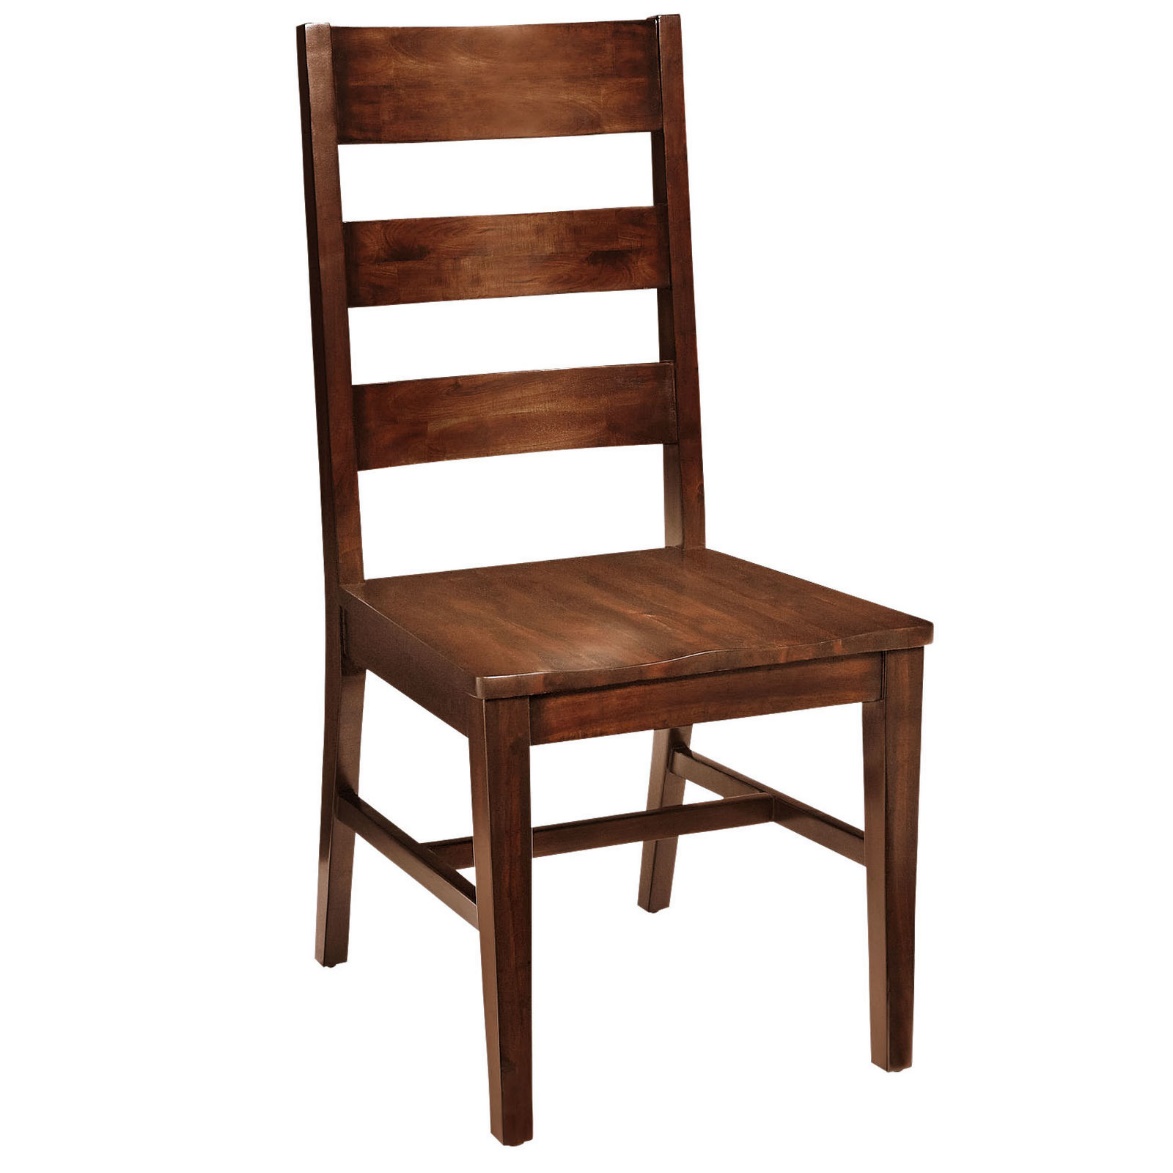


Chair.jpg


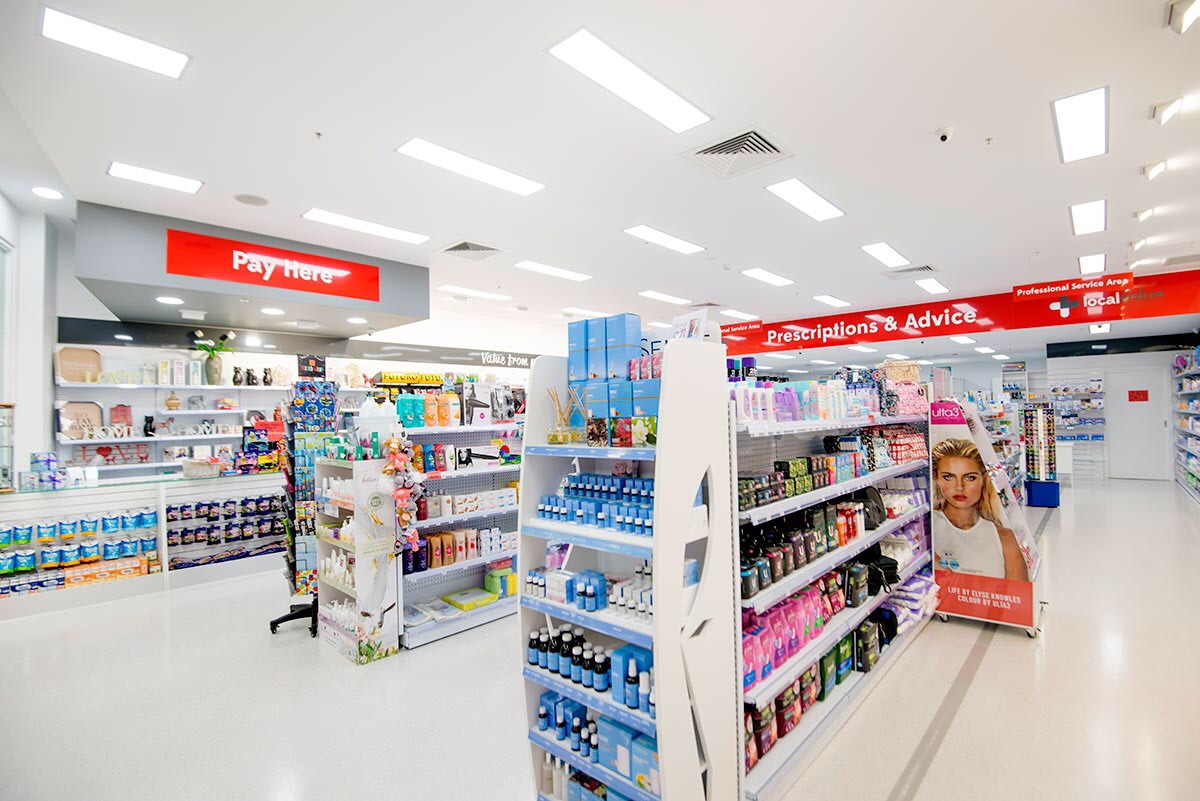


Chemists.jpg


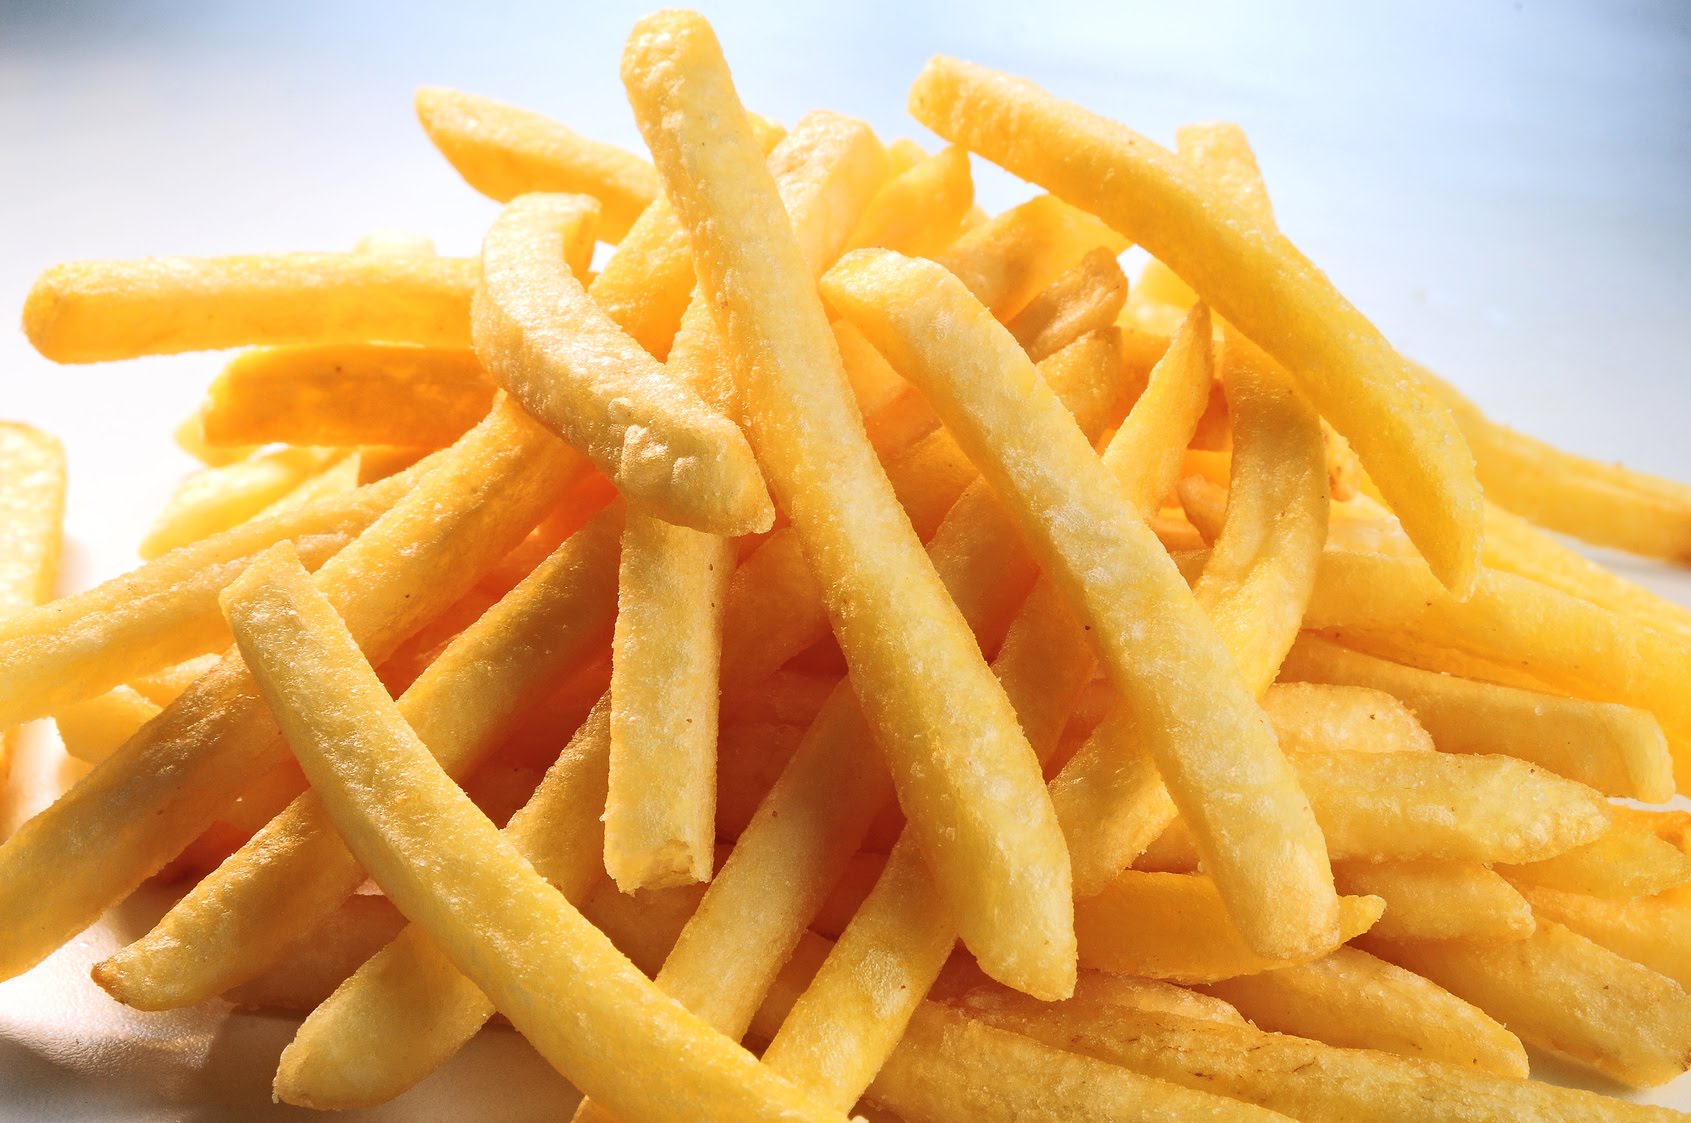


Chips.jpg


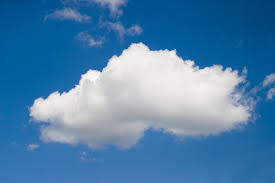


Cloud.jpg


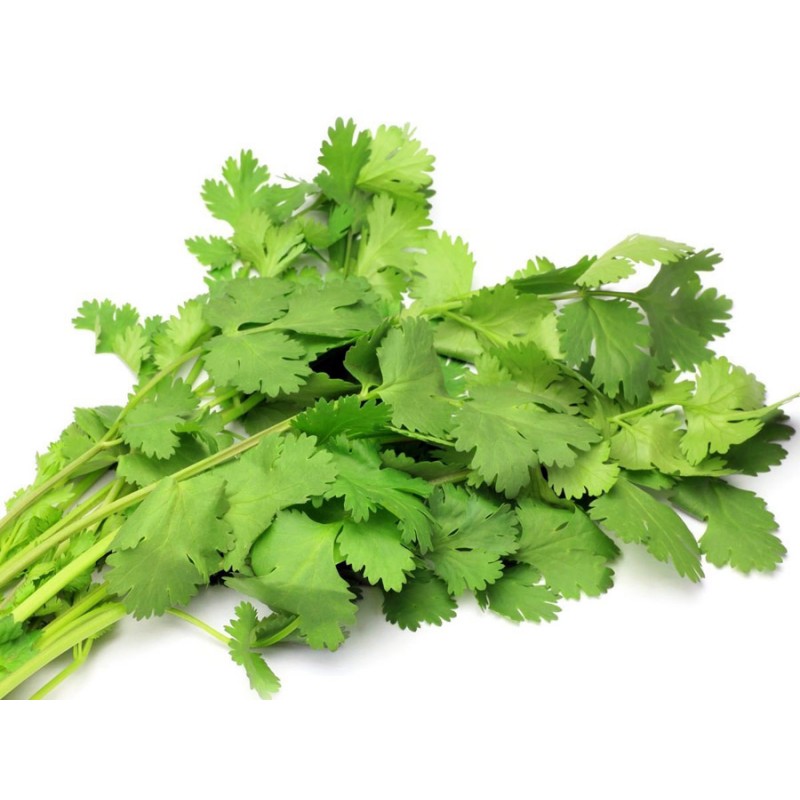


Coriander.jpg


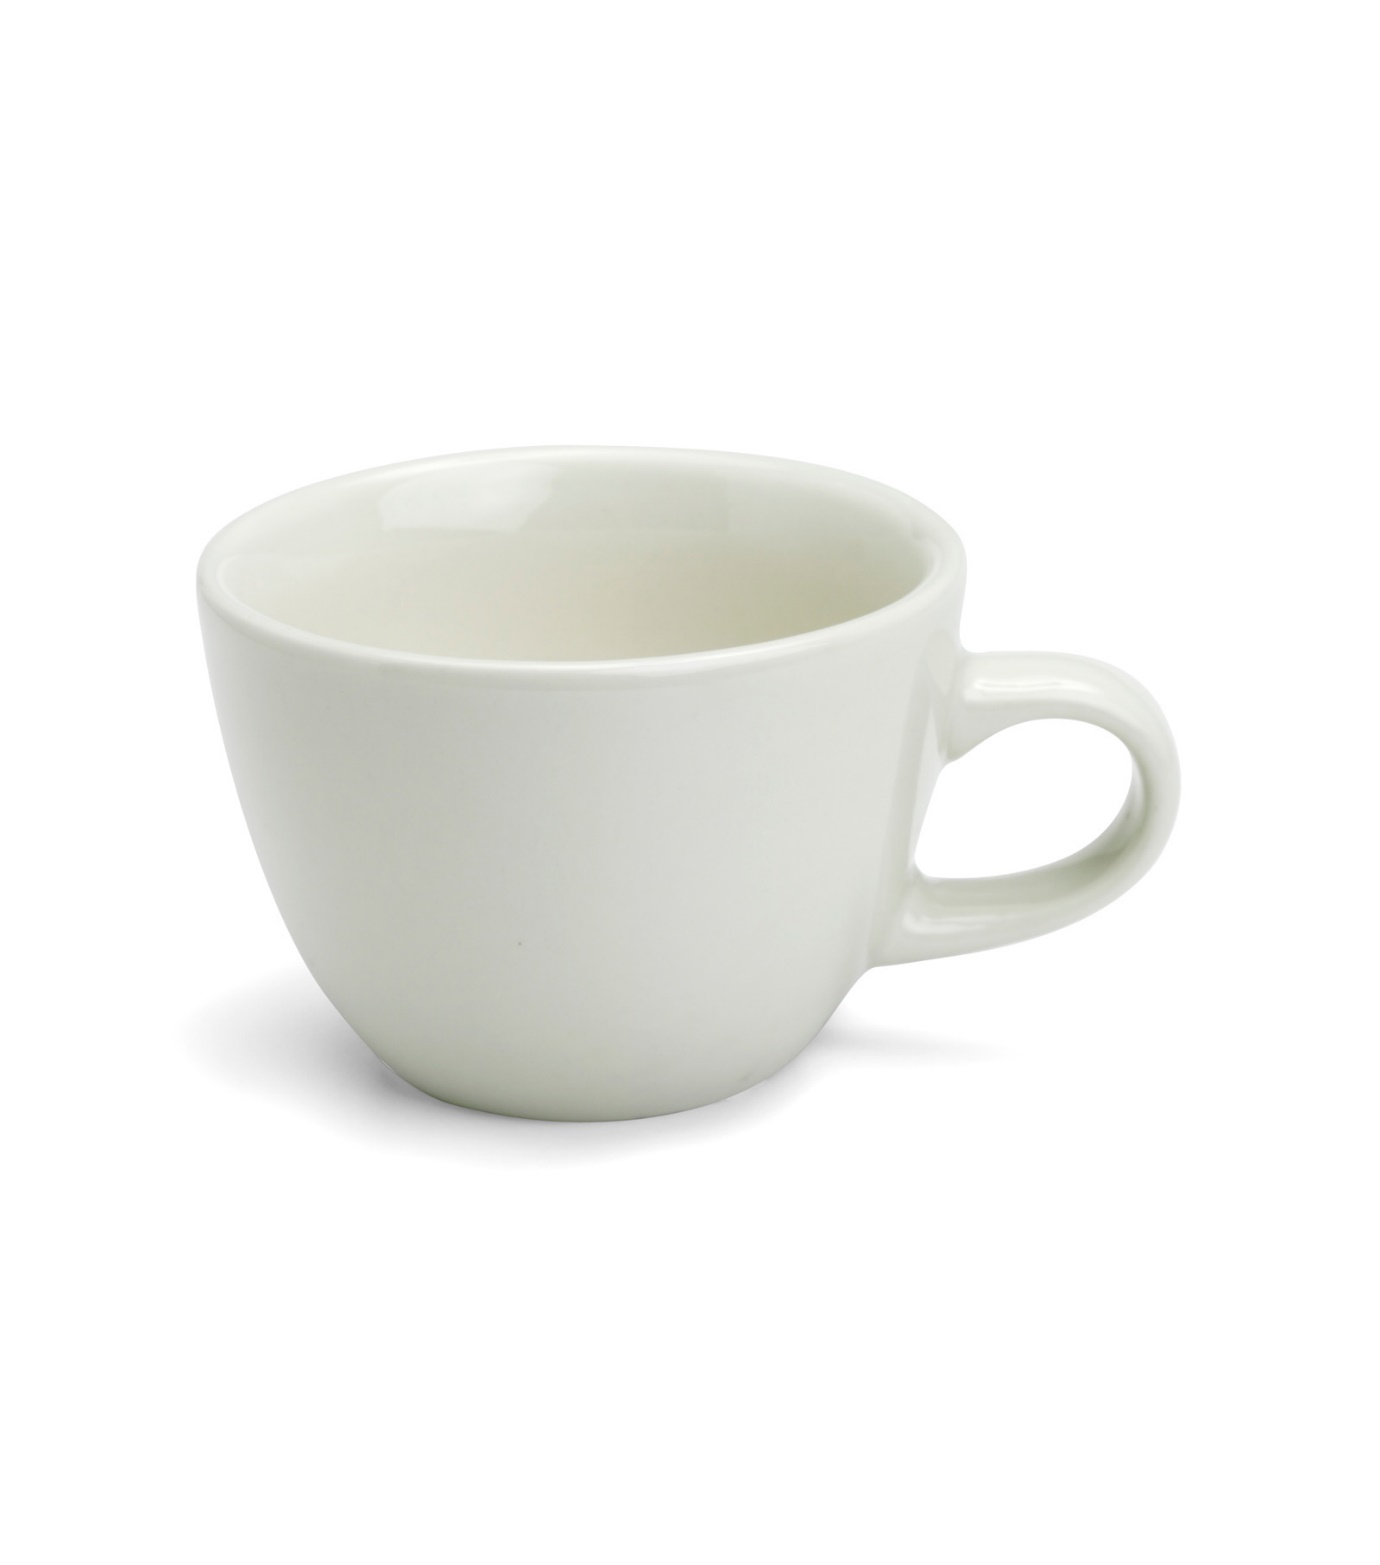


Cup.jpg


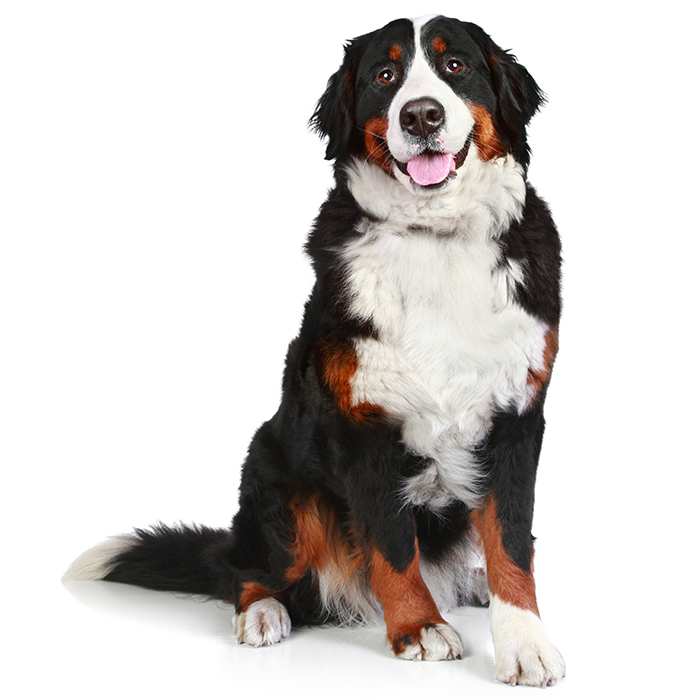


Dog.jpg


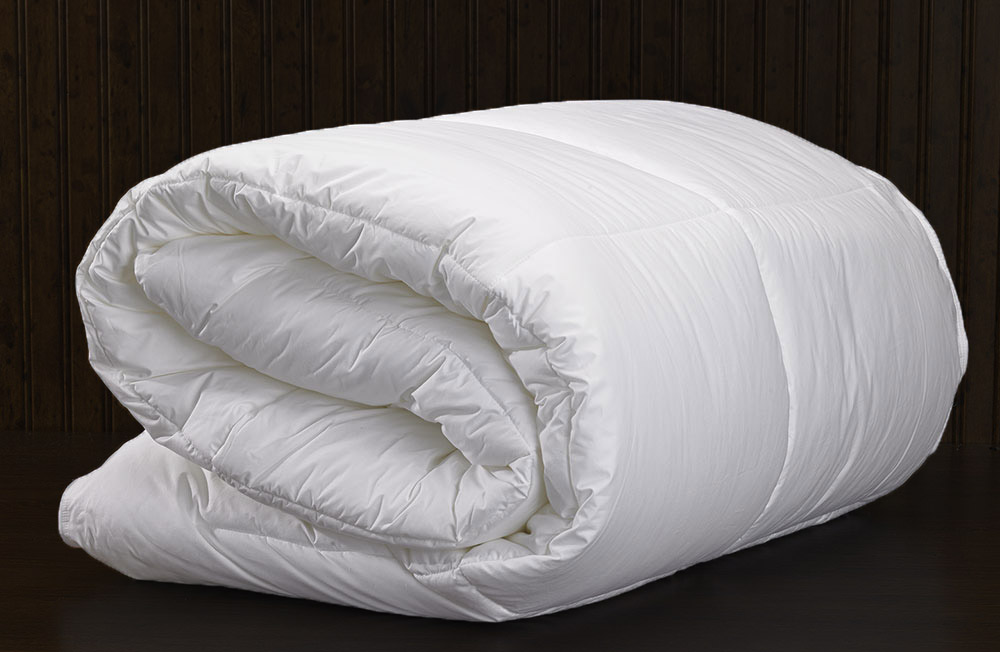


Doona.jpg


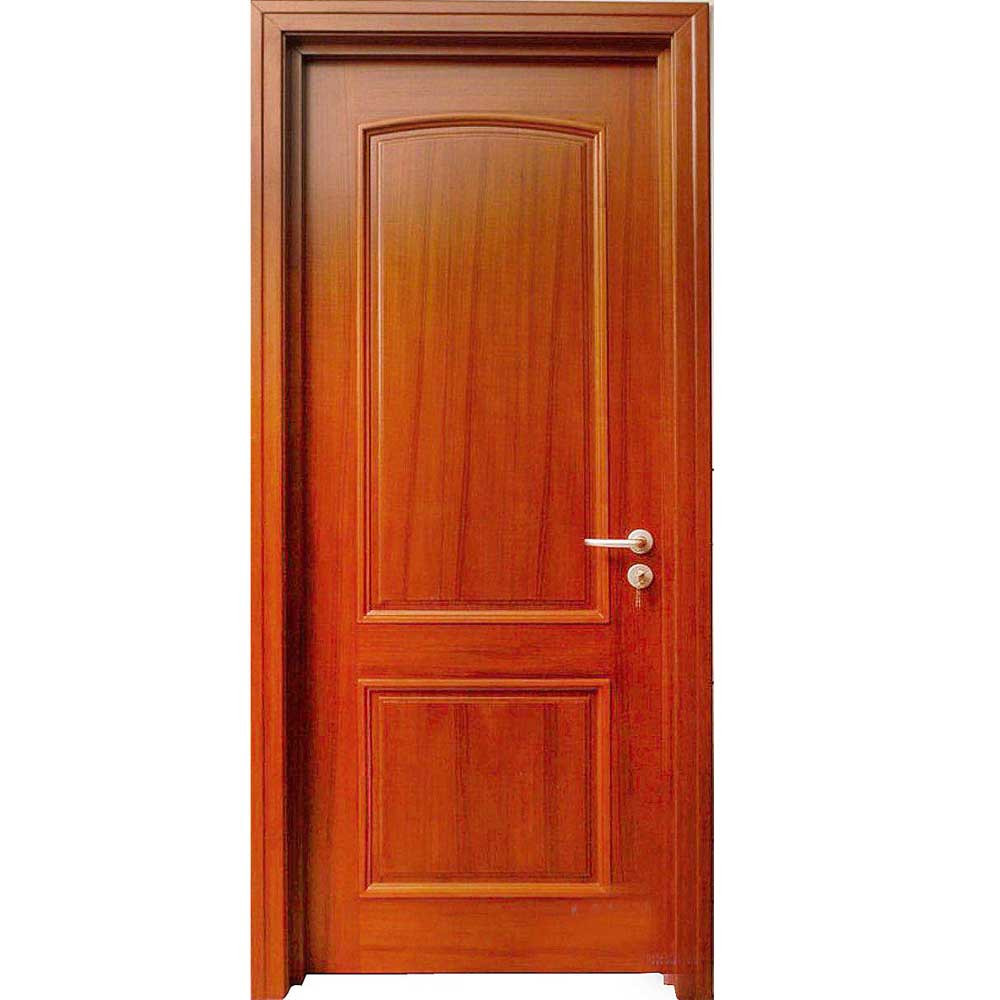


Door.jpg


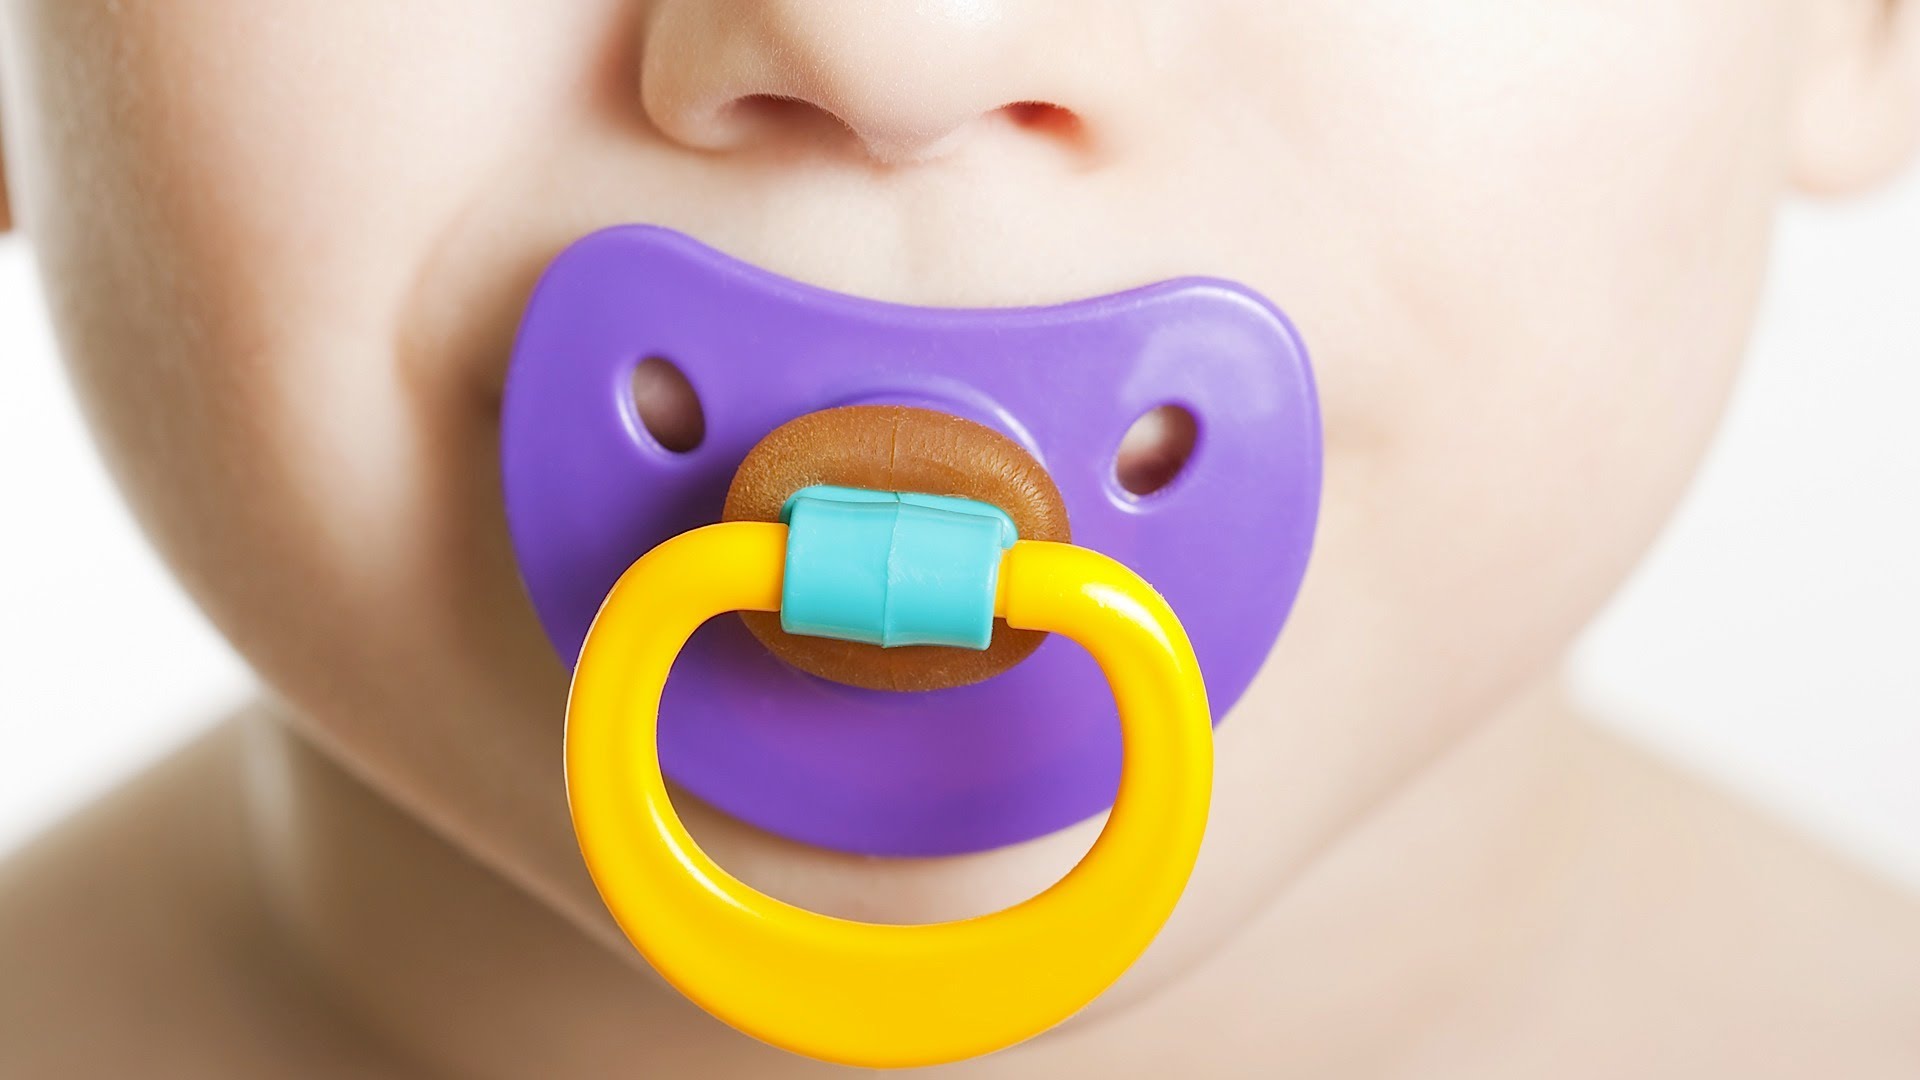


Dummy.jpg


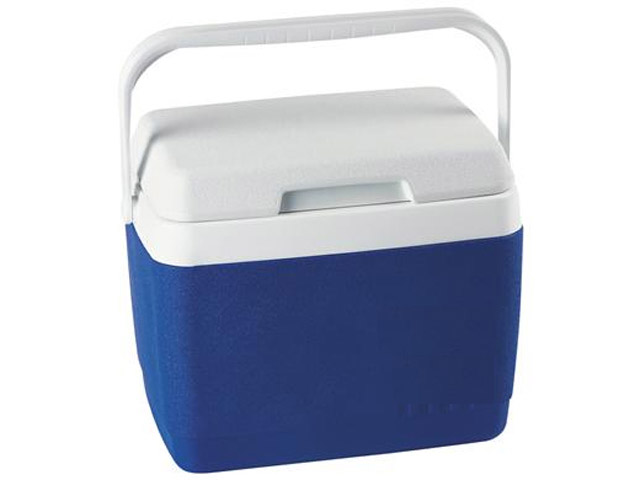


Esky.jpg


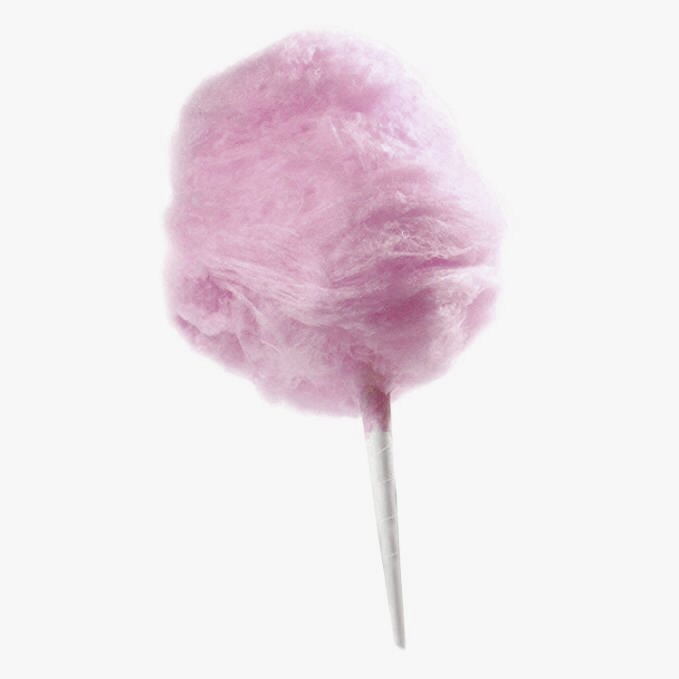


Fairyfloss.jpg


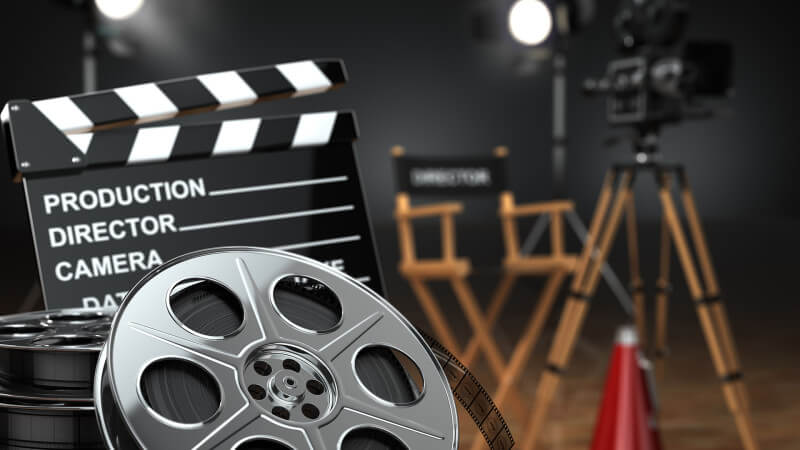


Film.jpg


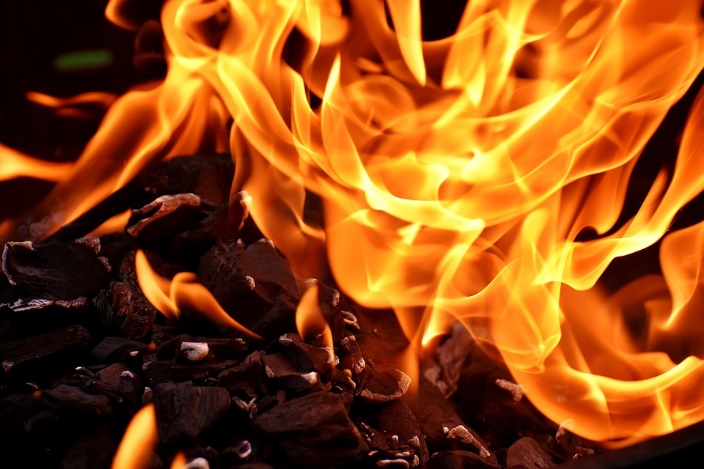


Fire.jpg


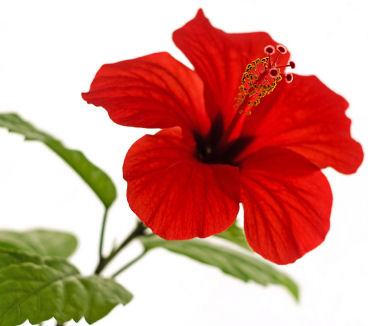


Flower.jpg


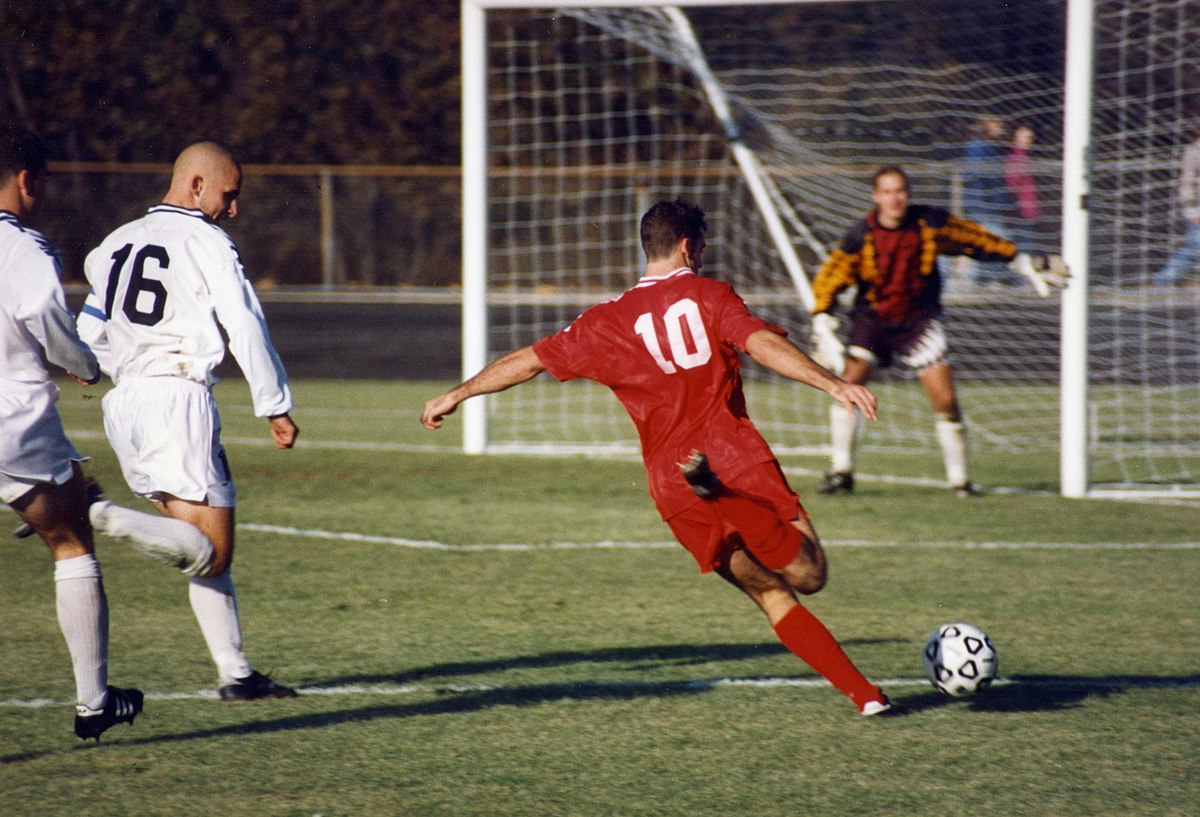


Football.jpg


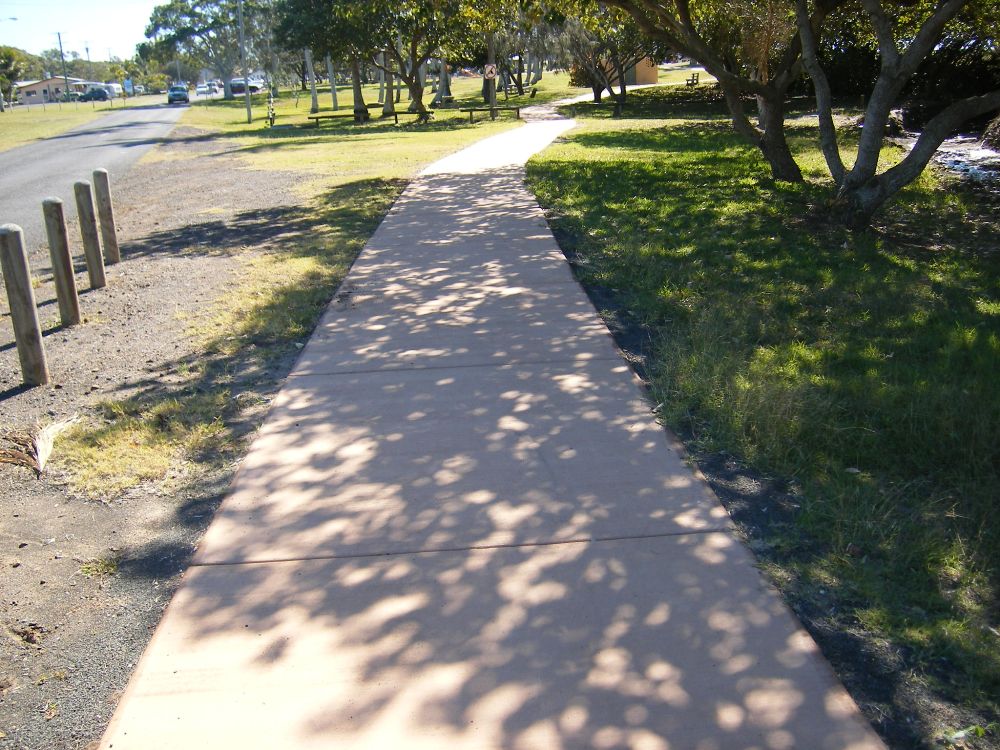


Footpath.jpg


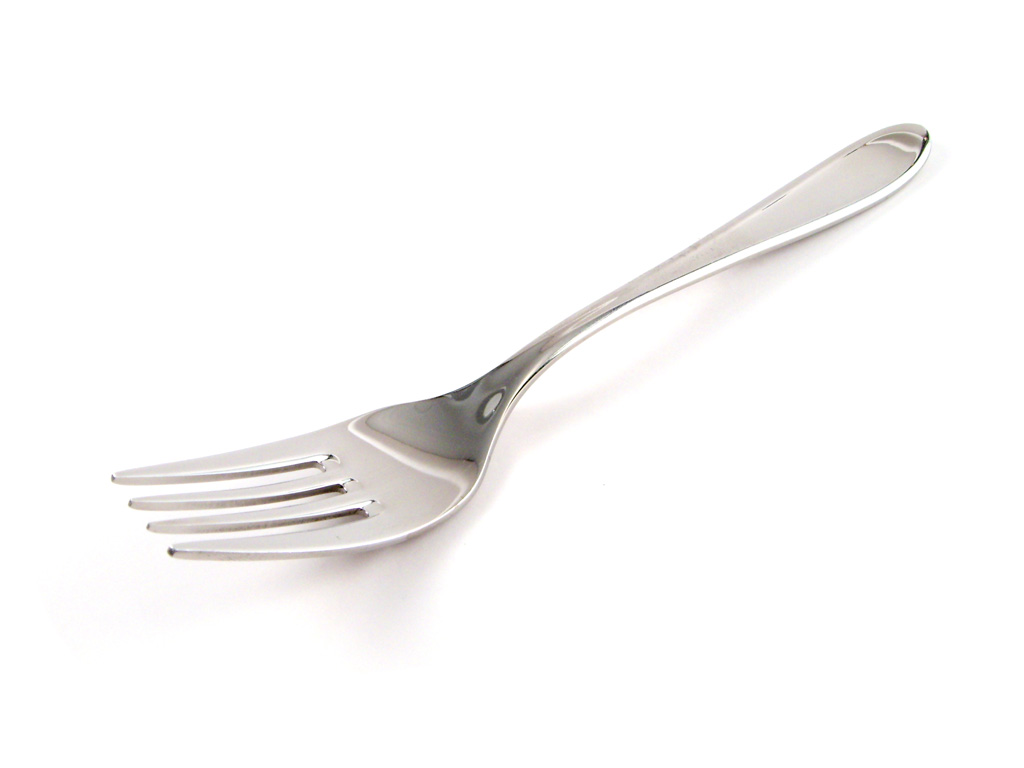


Fork.jpg


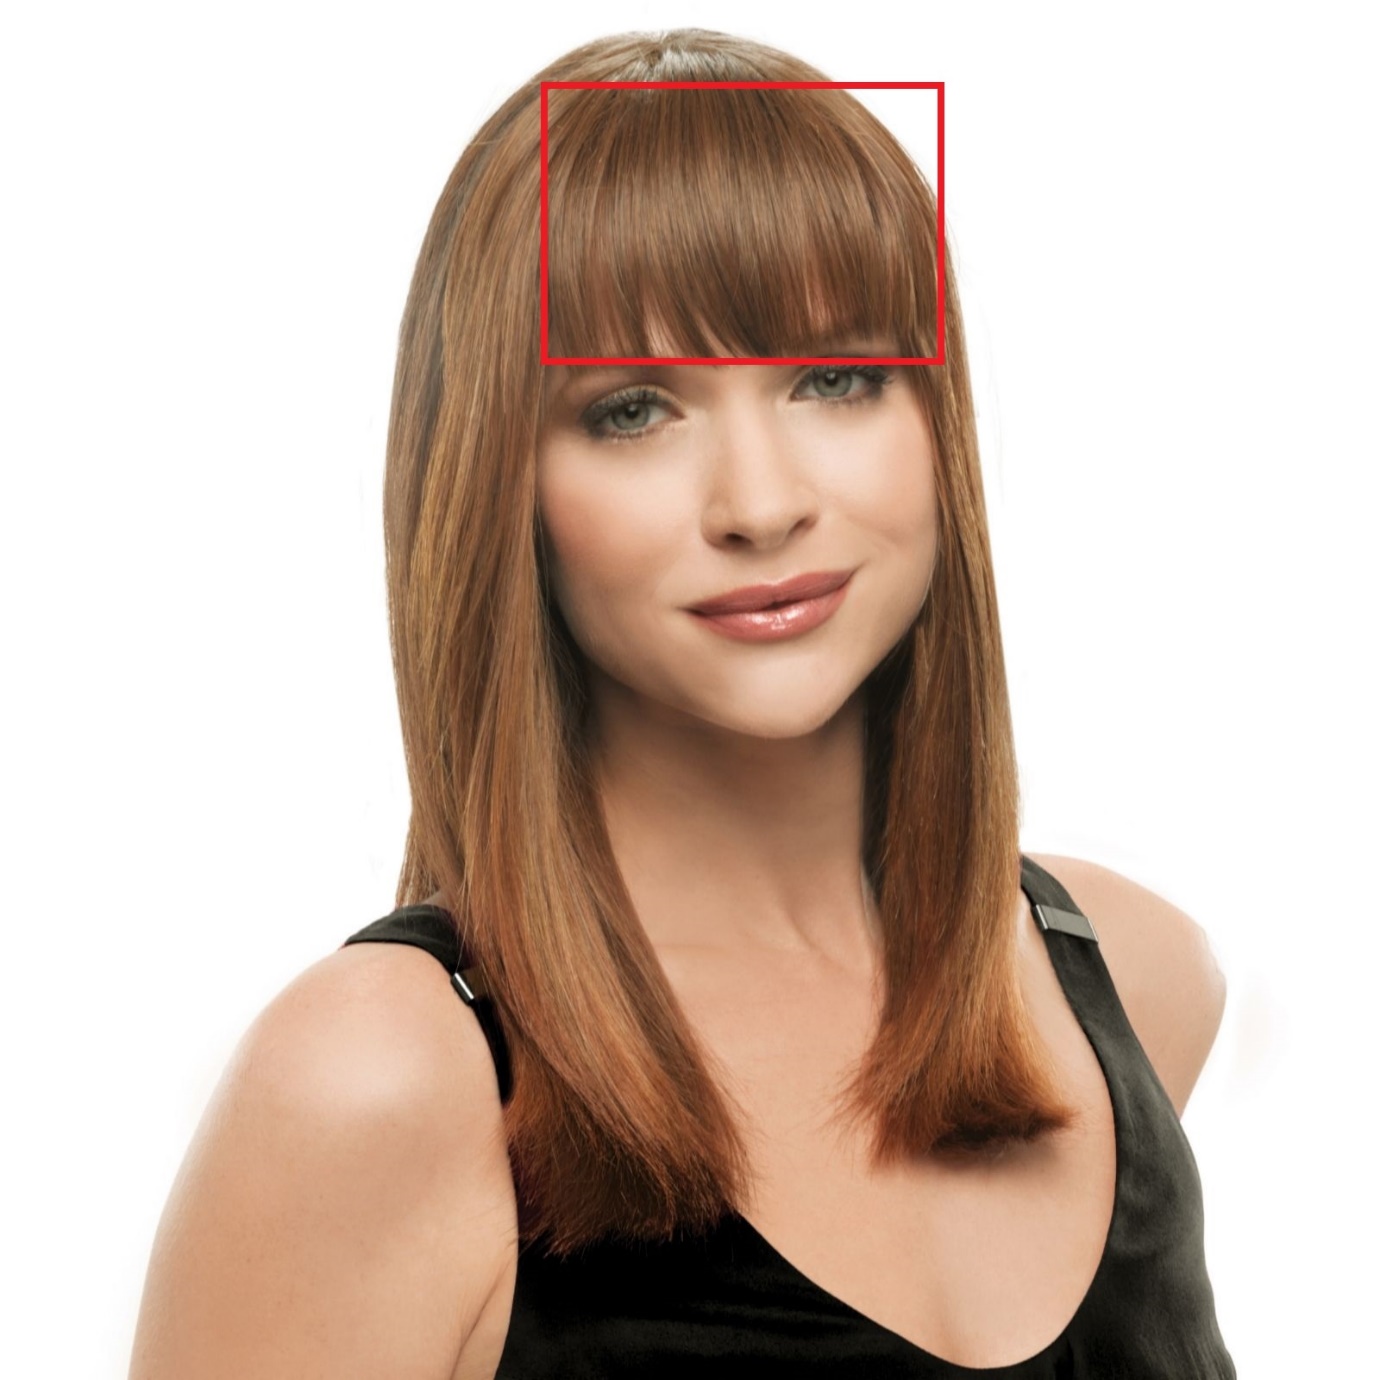


Fringe.jpg


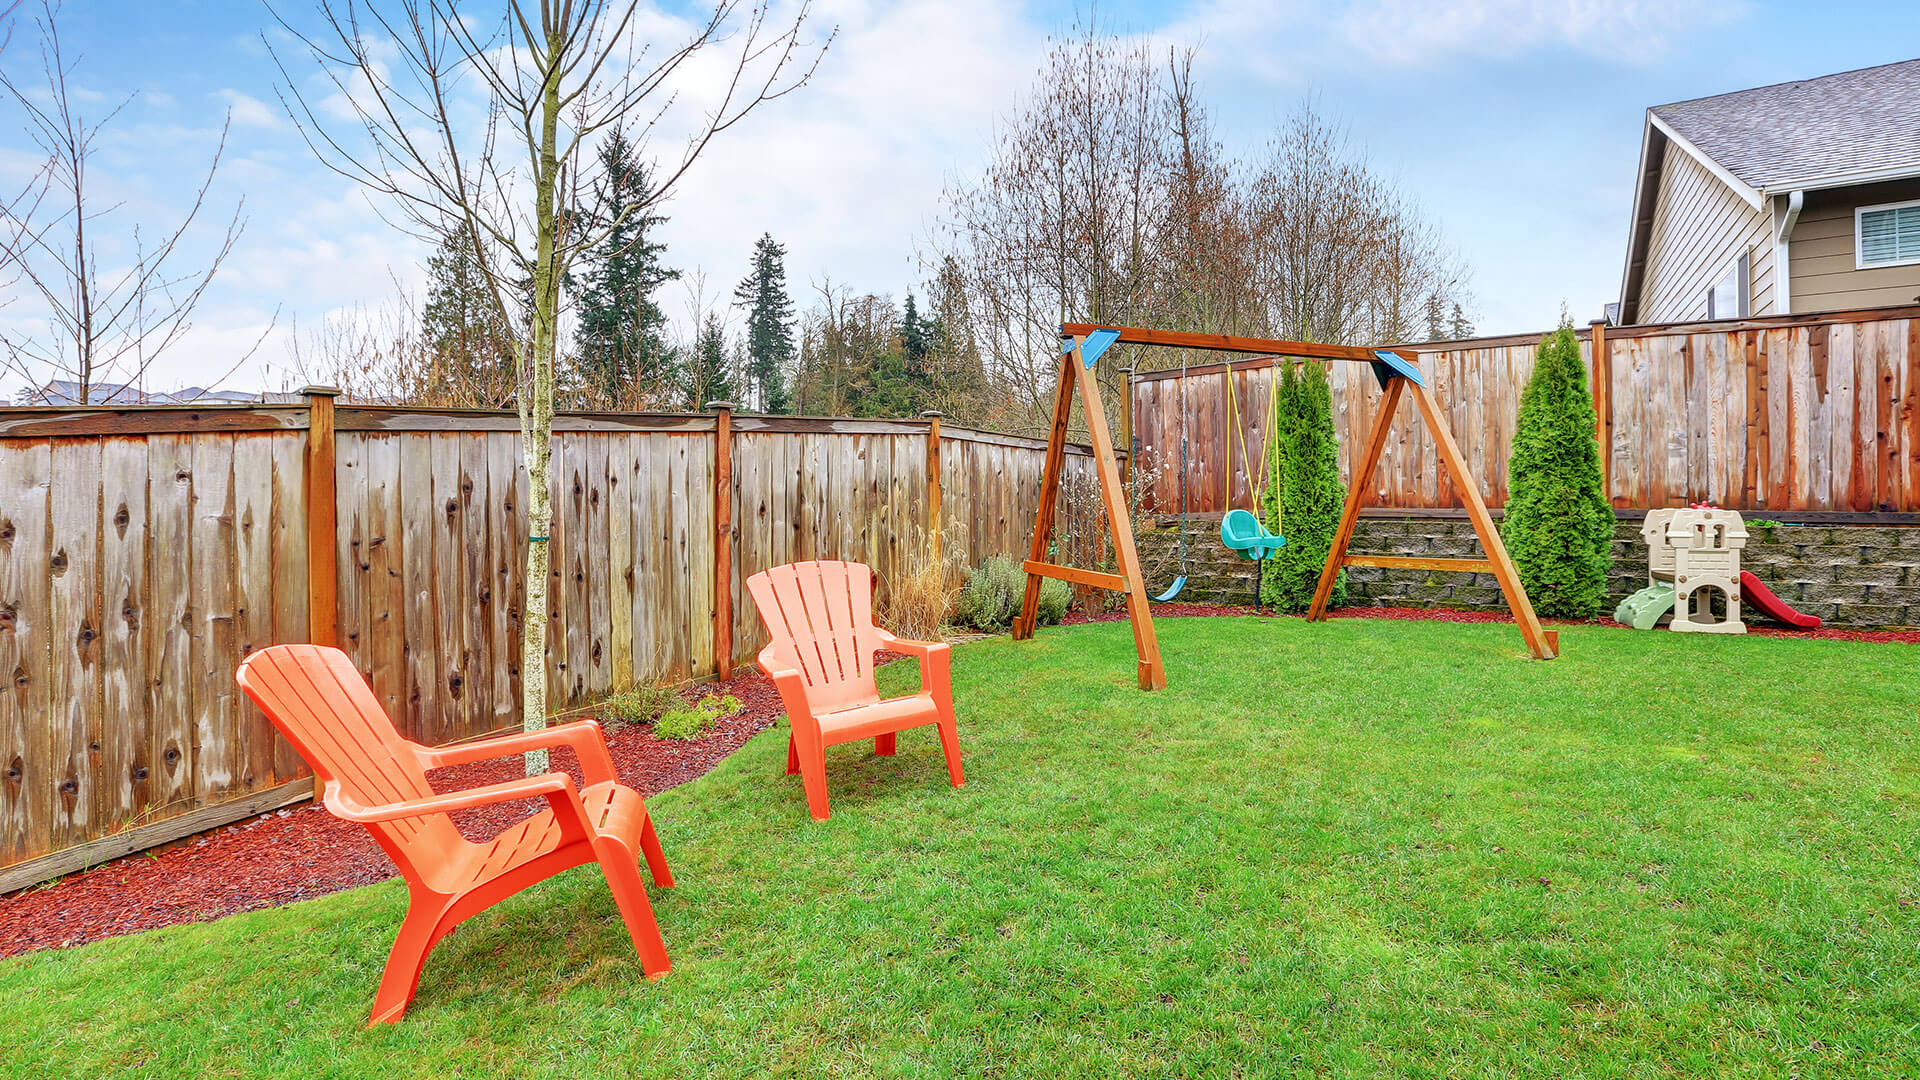


Garden.jpg


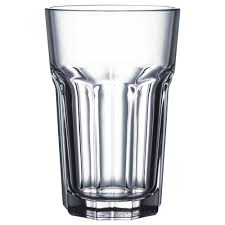


Glass.jpg


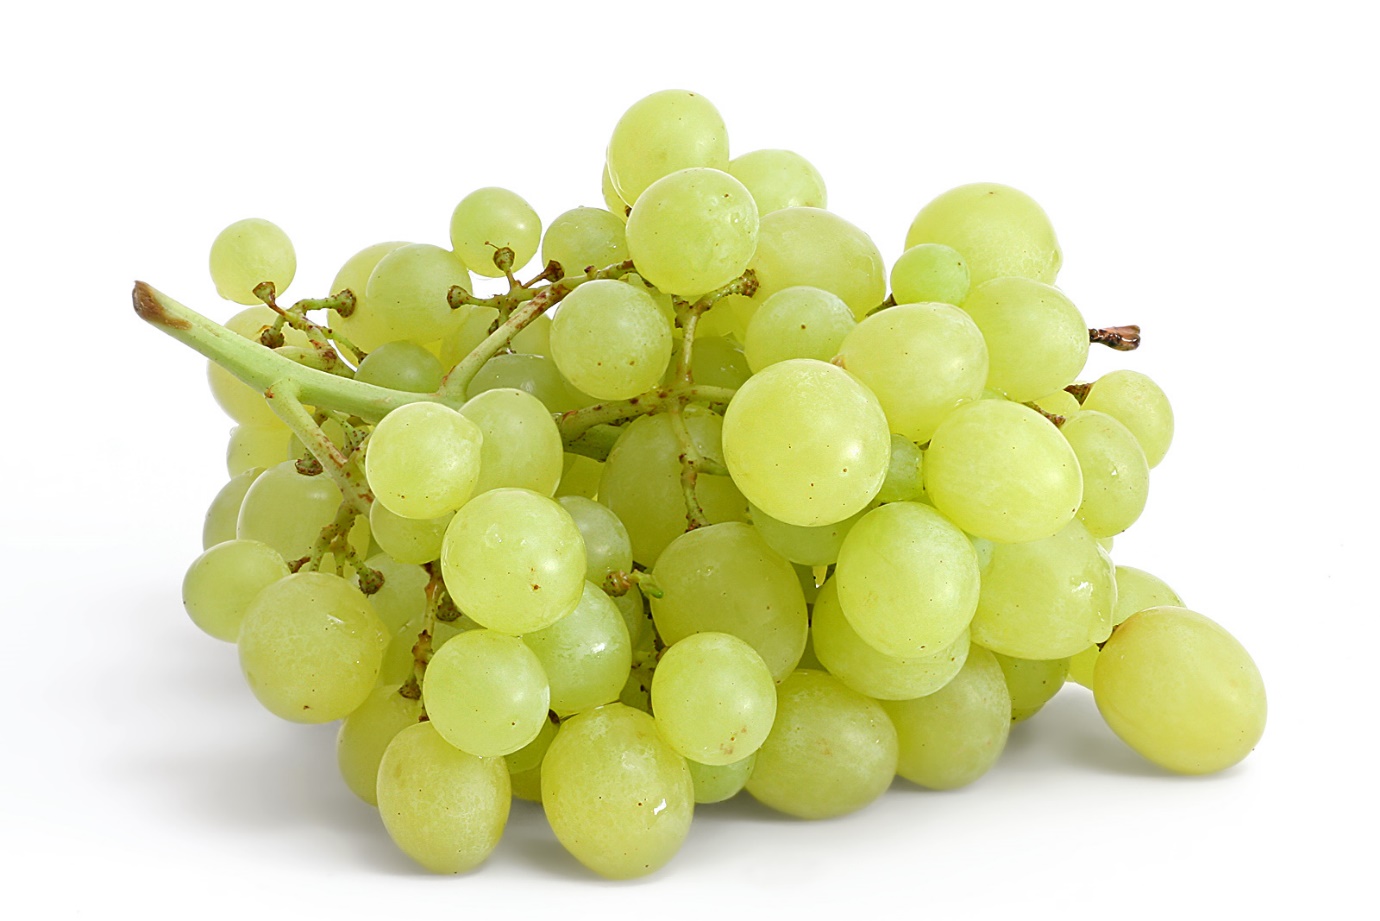


Grapes.jpg


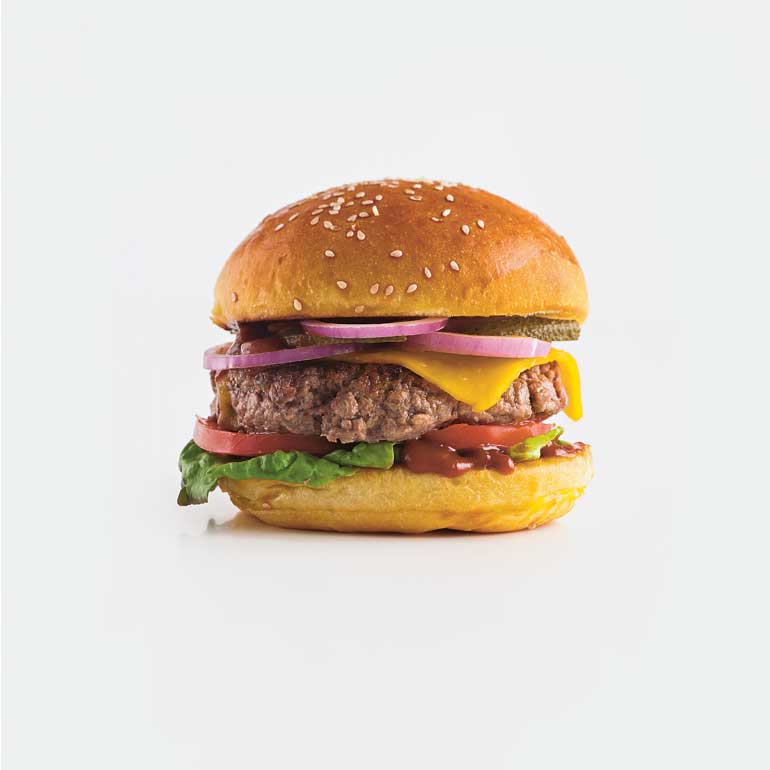


Hamburger.jpg


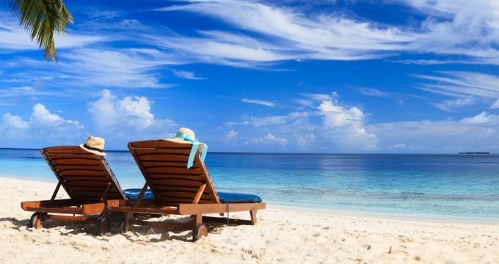


Holiday.jpg


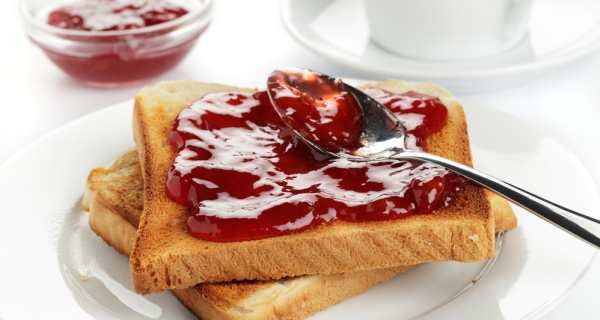


Jam.jpg


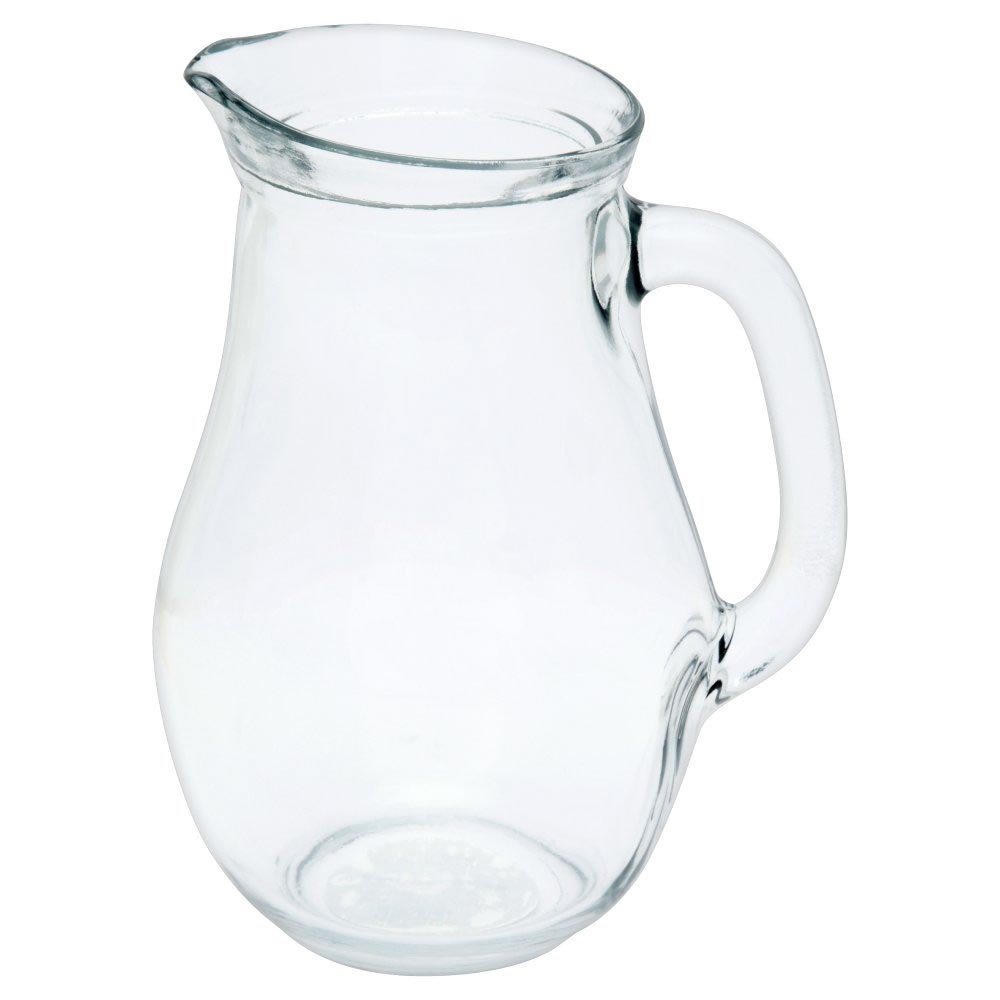


Jug.jpg


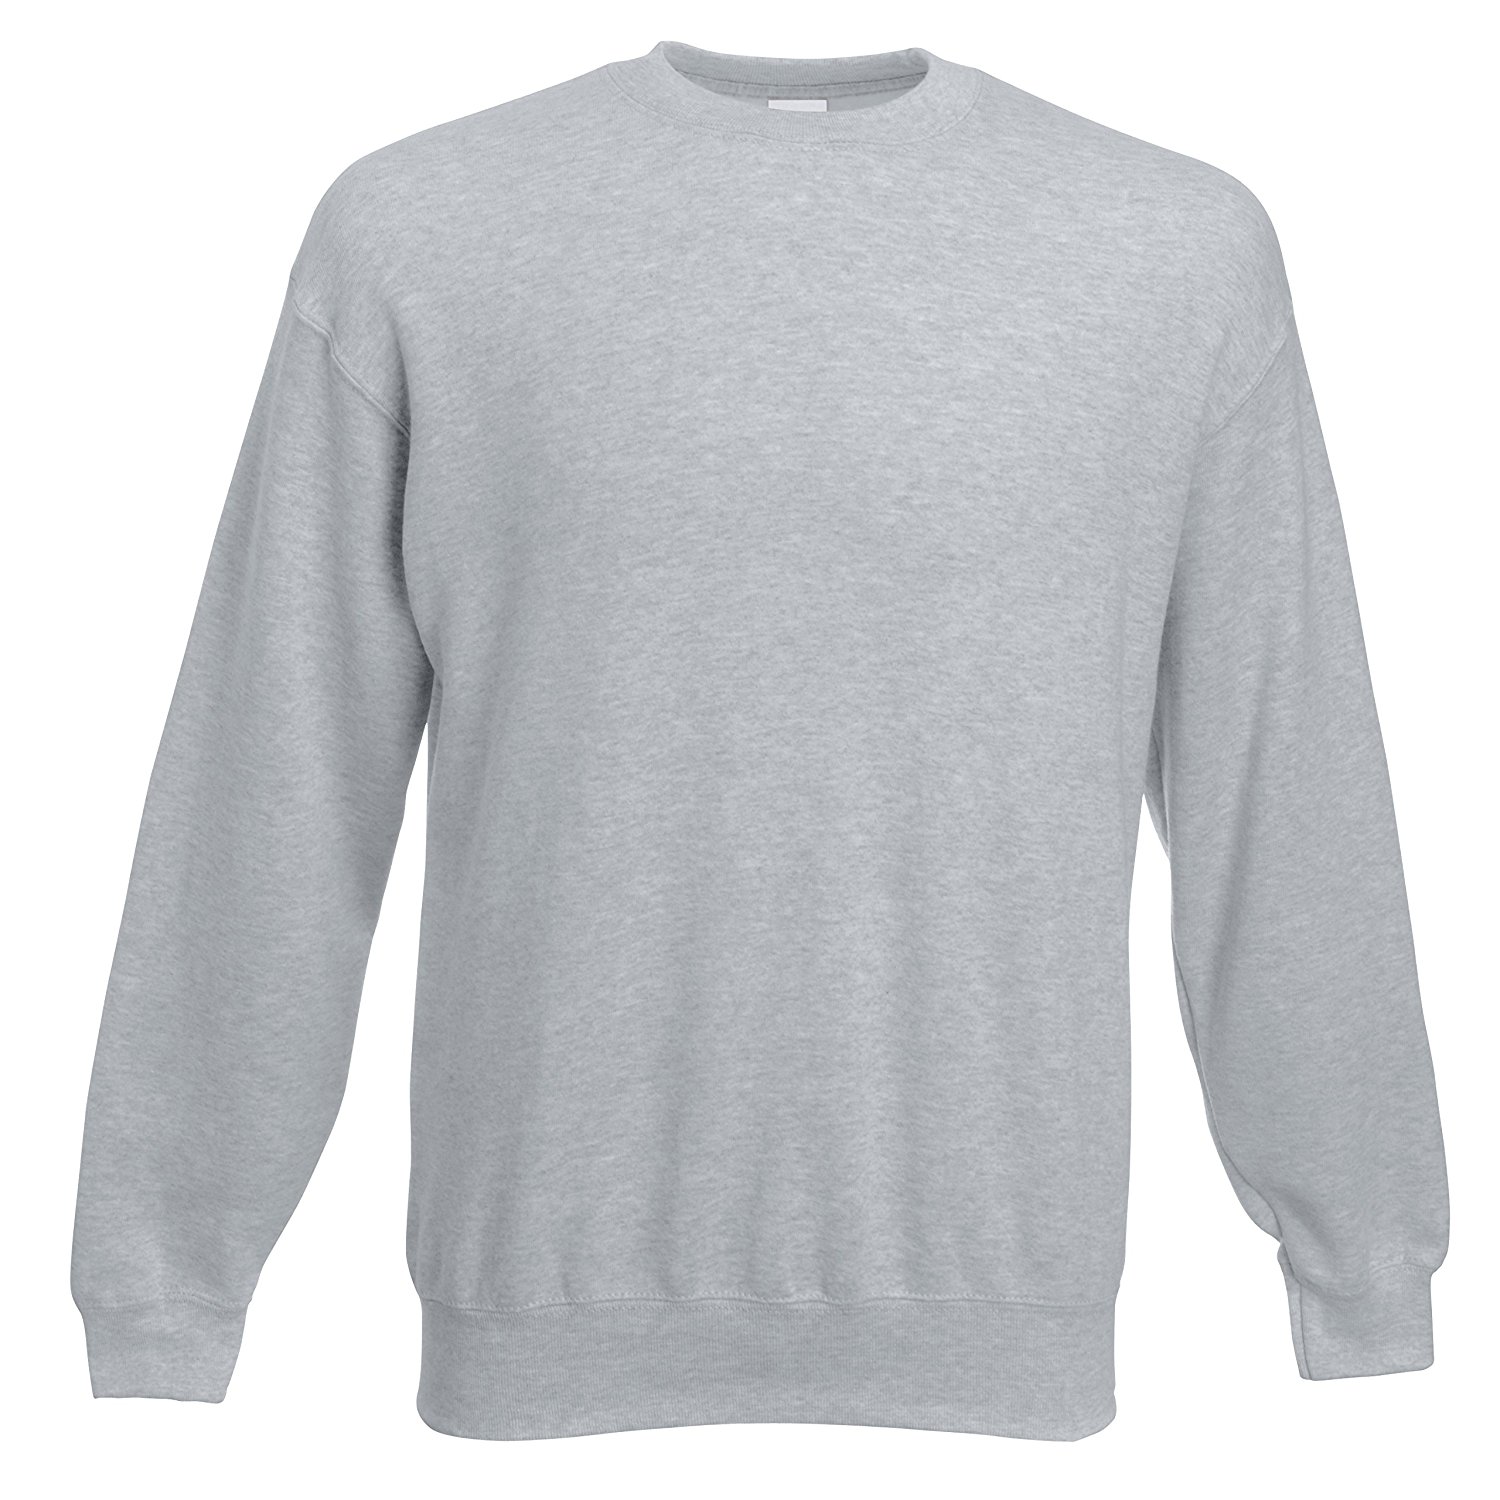


Jumper.jpg


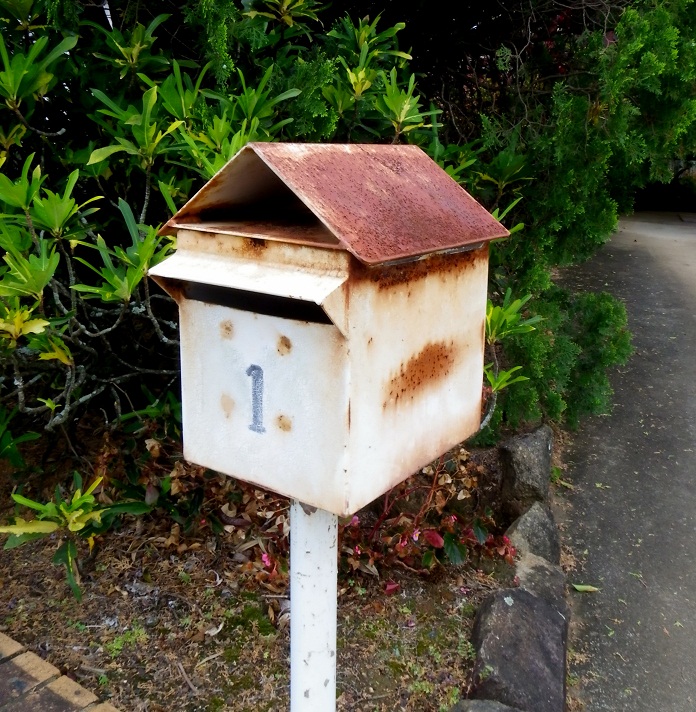


Letterbox.jpg


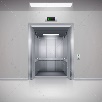


Lift.jpg


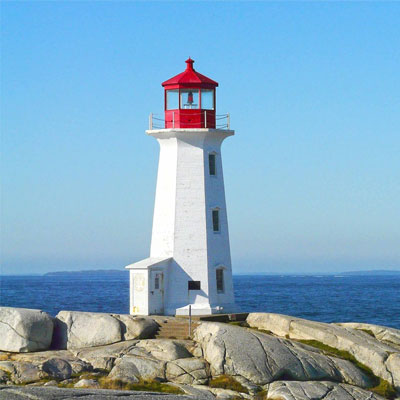


Lighthouse.jpg


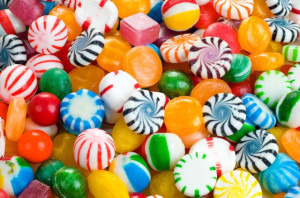


Lolly.jpg


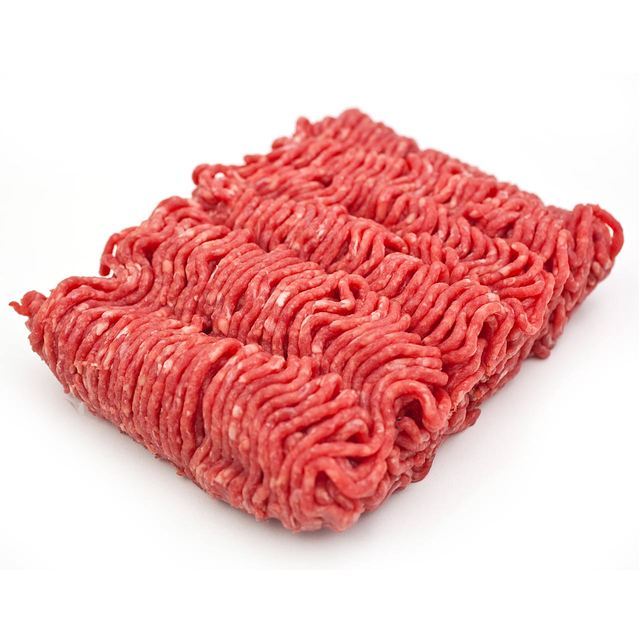


Mince.jpg


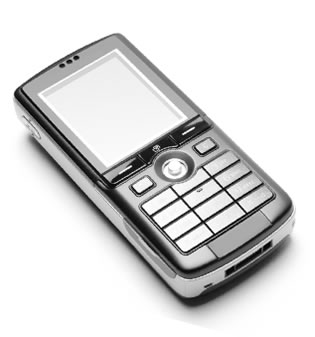


Mobilephone.jpg


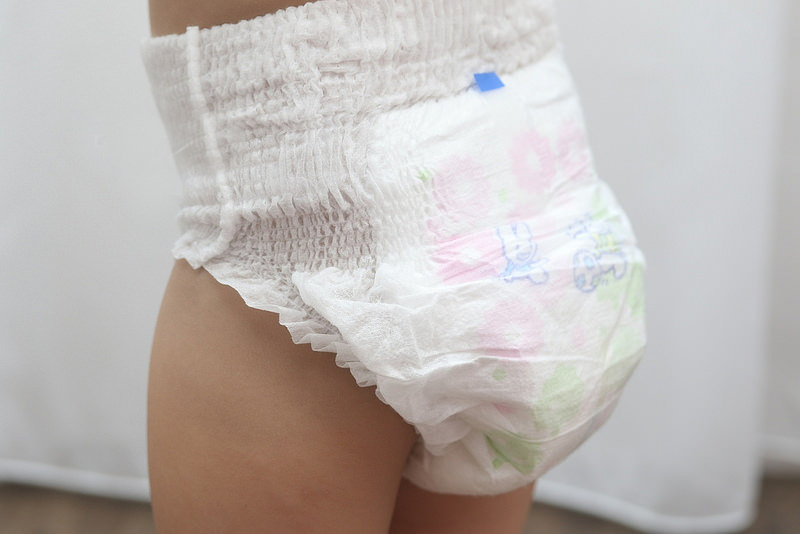


Nappy.jpg


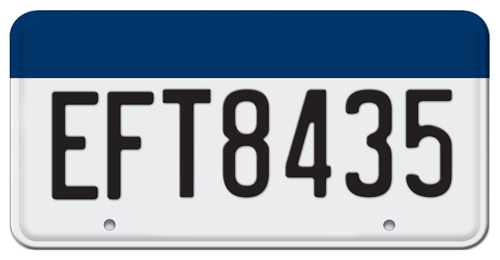


Numberplate.jpg


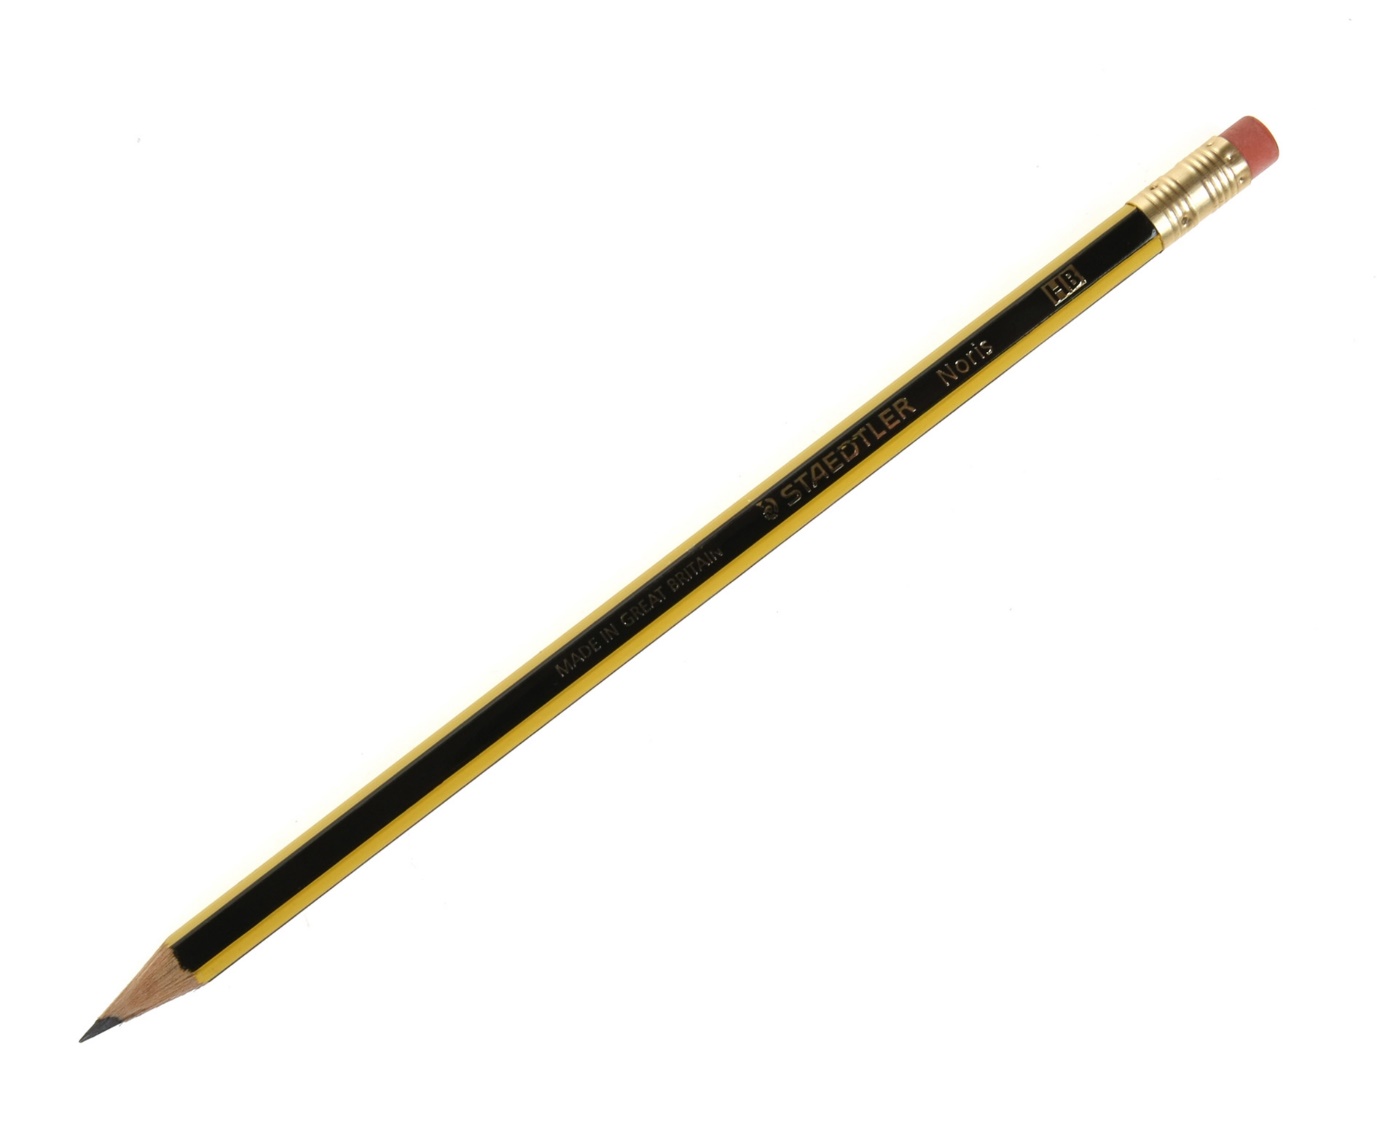


Pencil.jpg


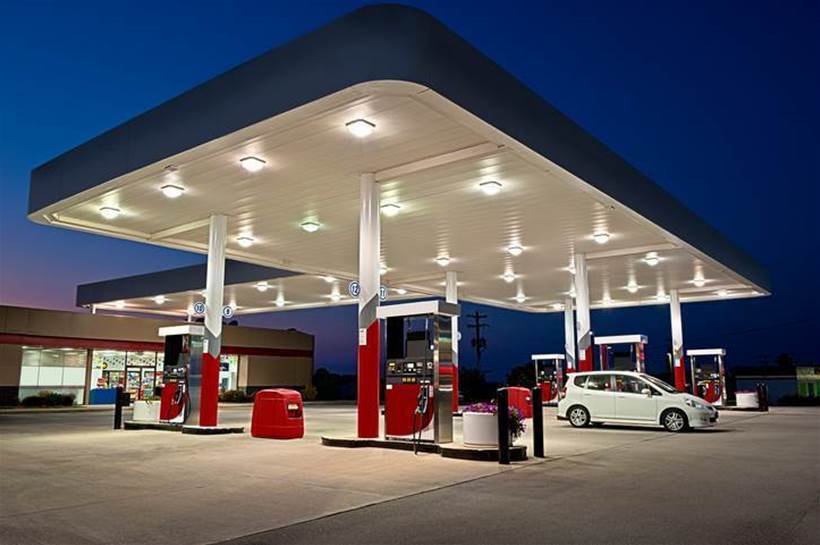


Petrolstation.jpg


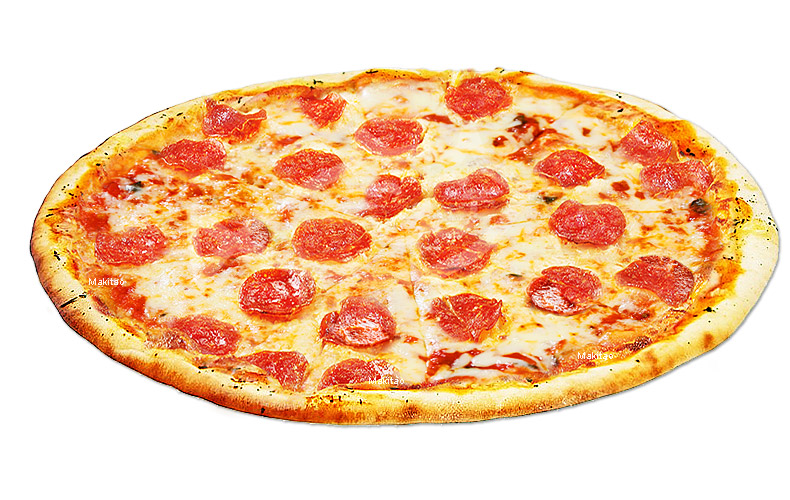


Pizza.jpg


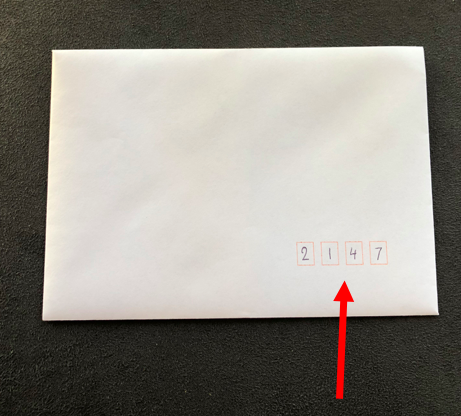


Postcode.jpg


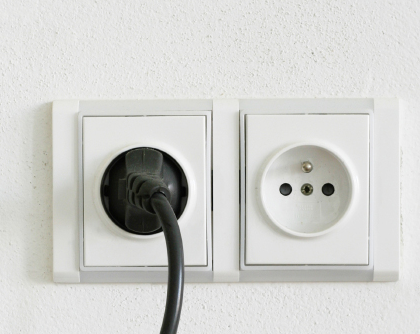


Powerpoint.jpg


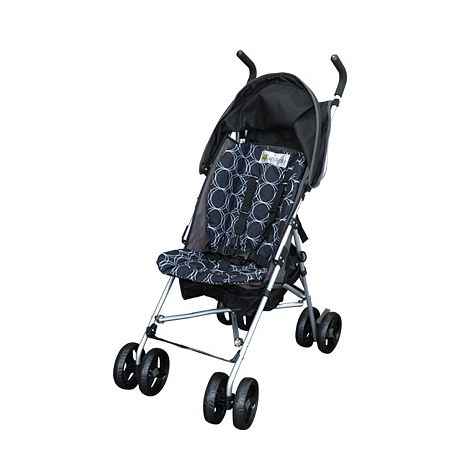


Pram.jpg


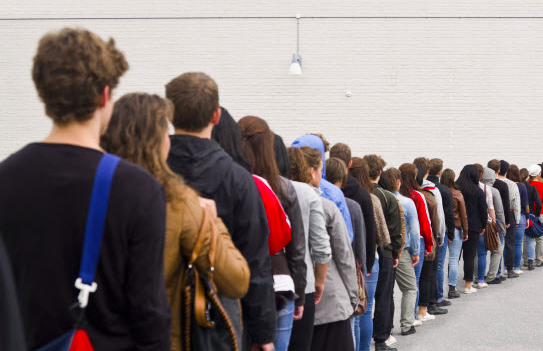


Queue.jpg


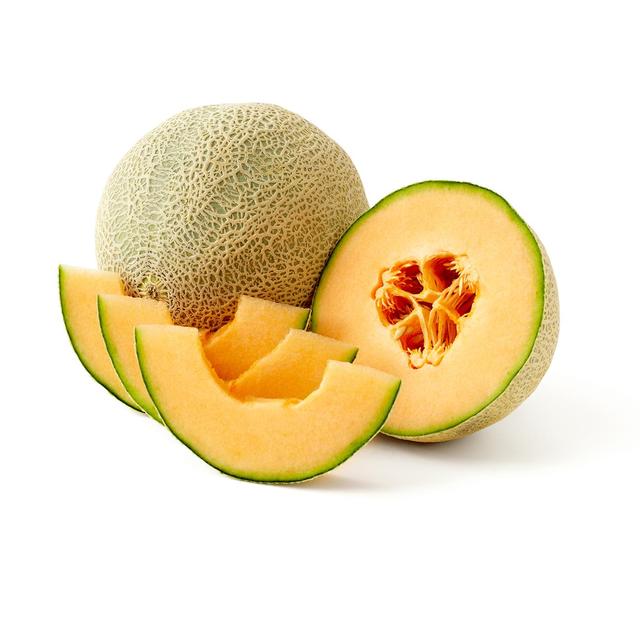


Rockmelon.jpg


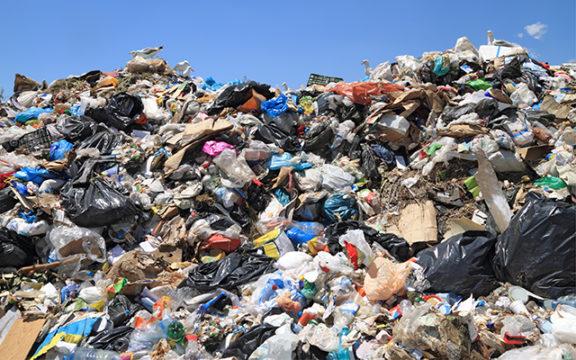


Rubbish.jpg


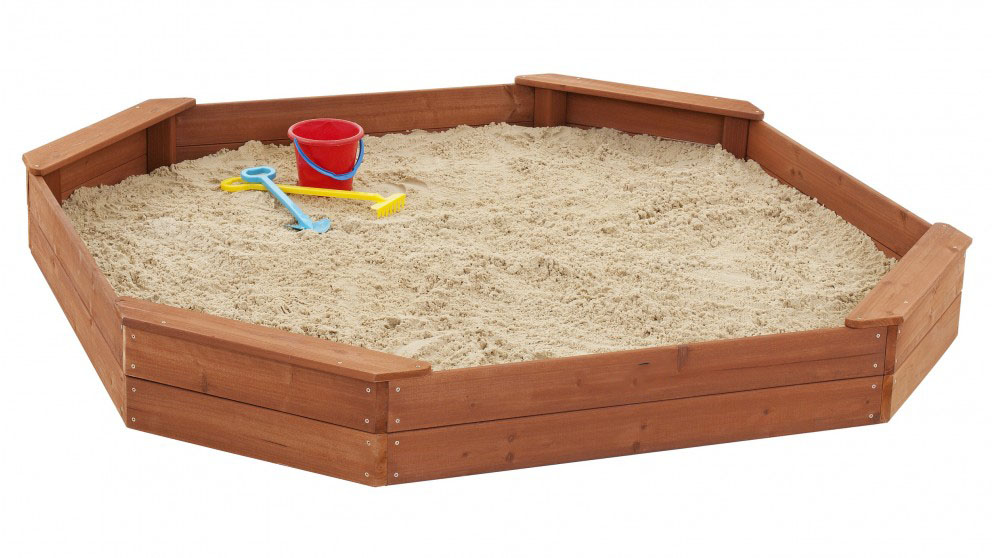


Sandpit.jpg


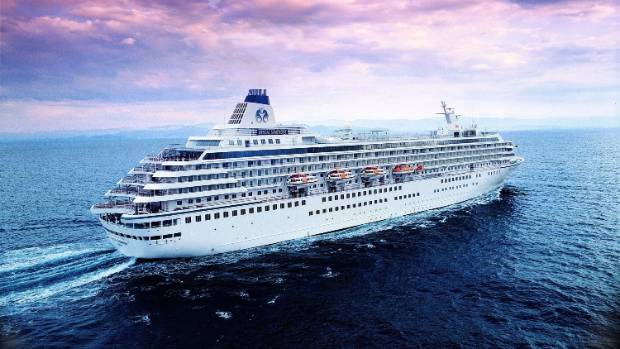


Ship.jpg


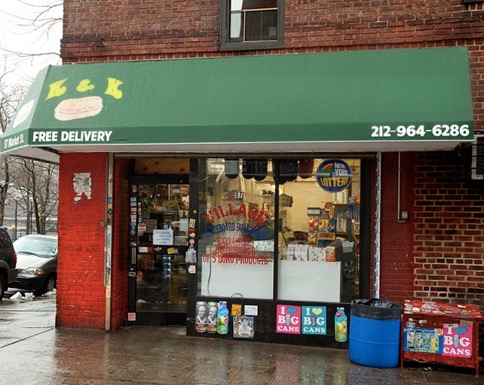


Shop.jpg


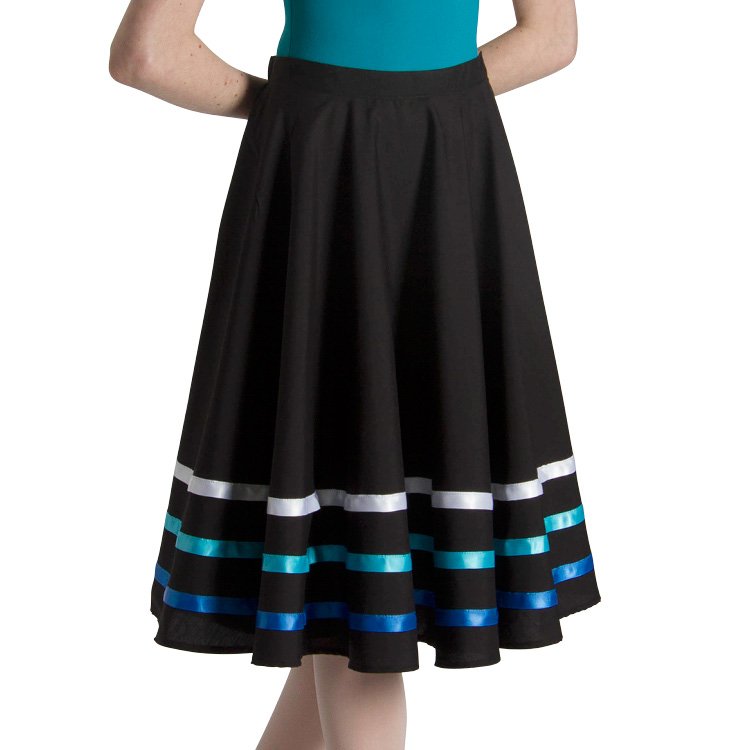


Skirt.jpg


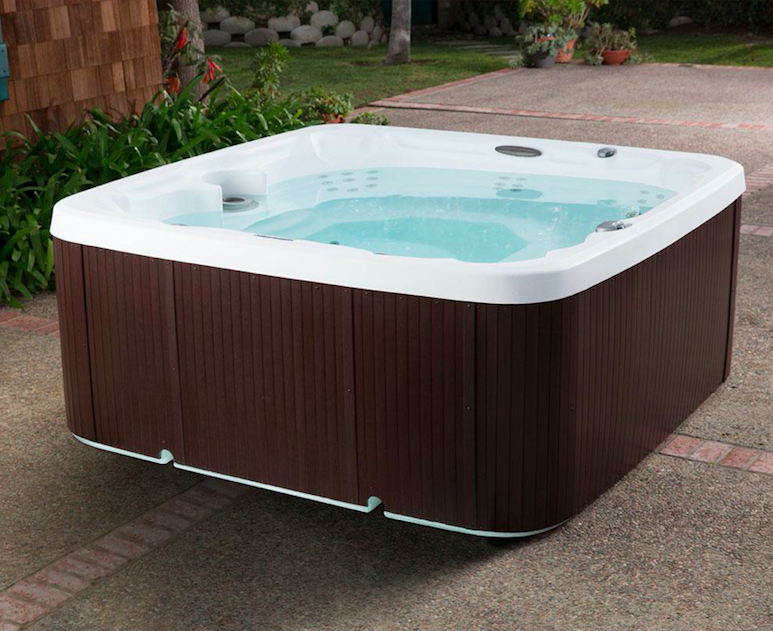


Spa.jpg


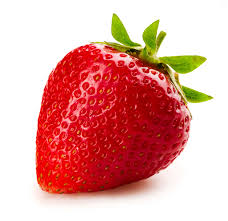


Strawberry.jpg


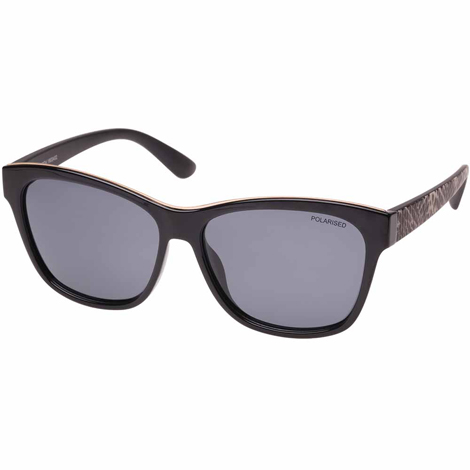


Sunglasses.jpg


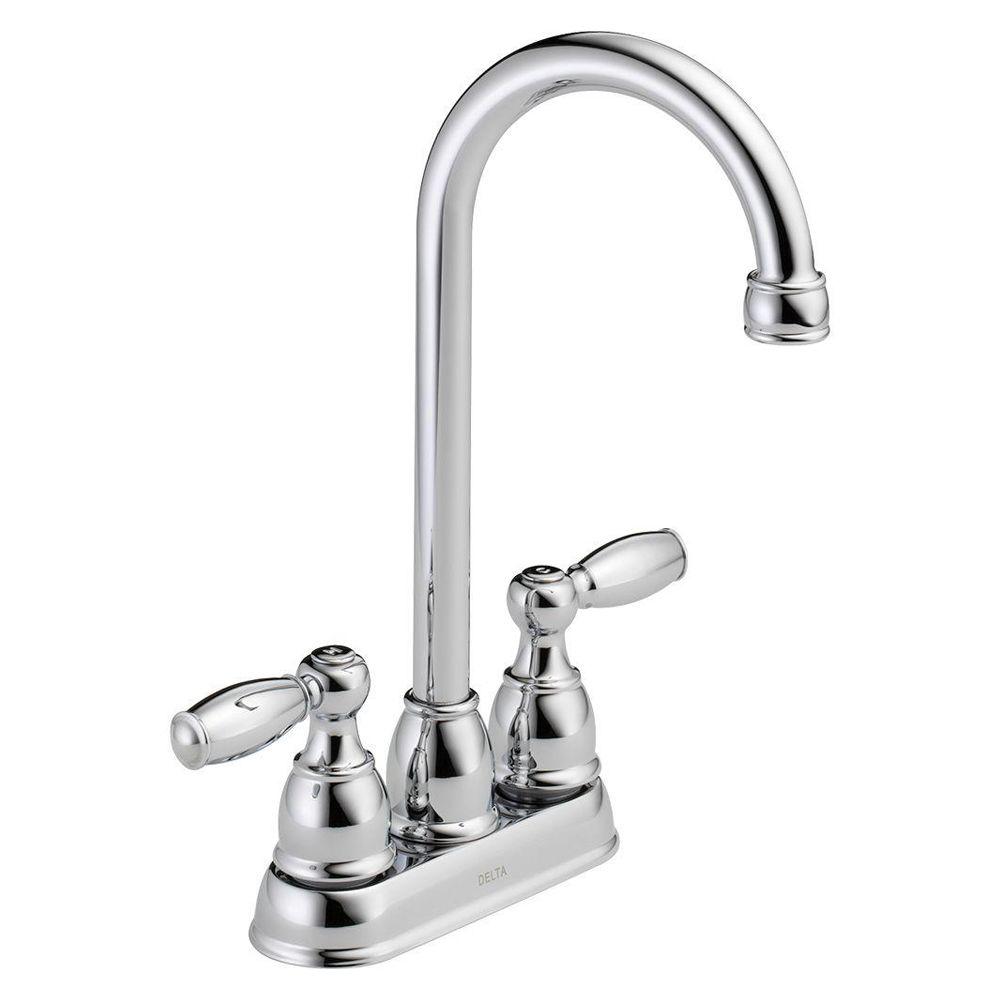


Tap.jpg


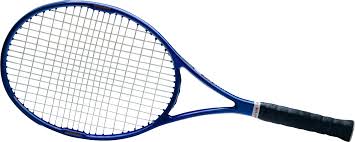


Tennisracket.jpg


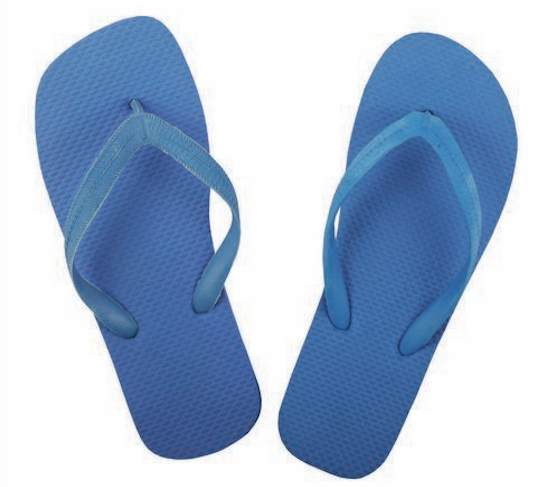


Thongs.jpg


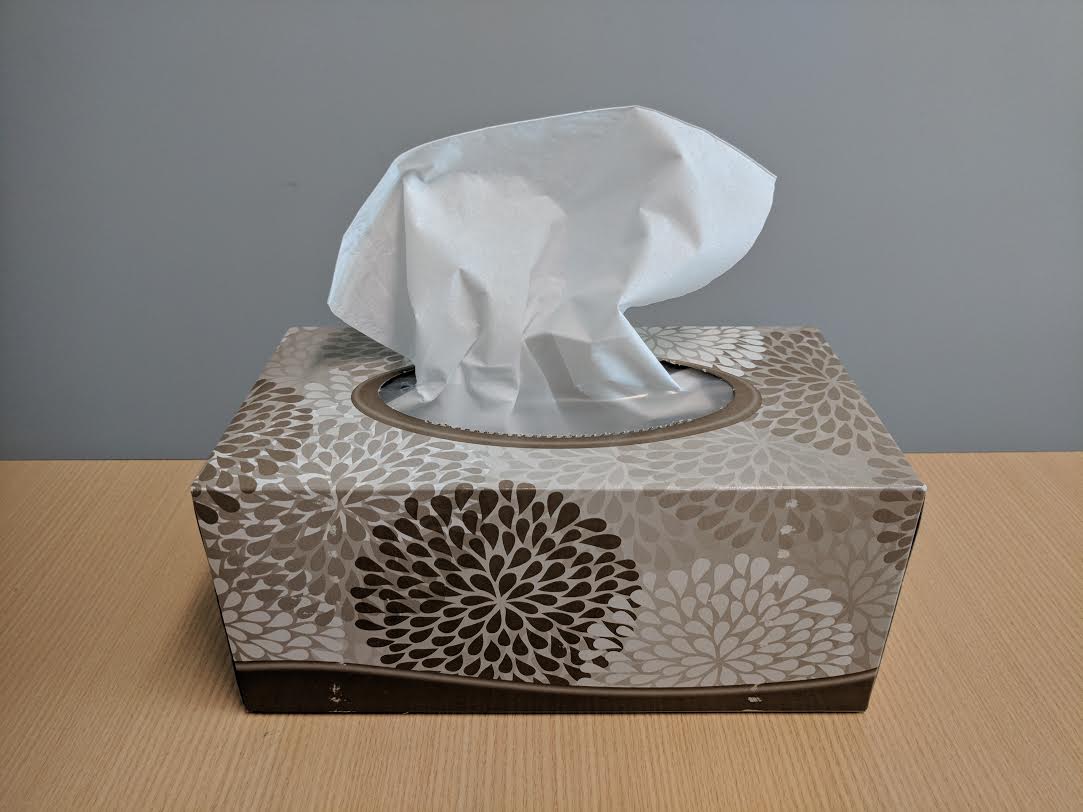


Tissue.jpg


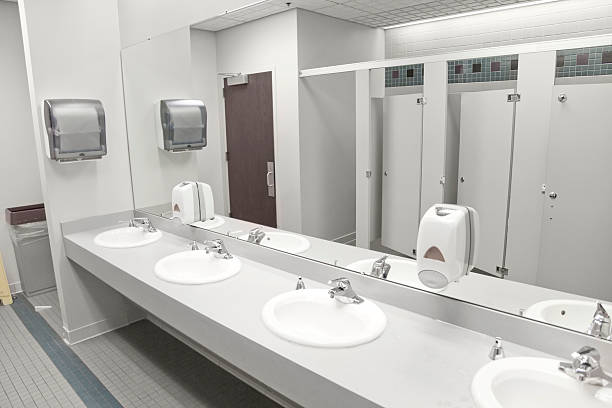


Toilet.jpg


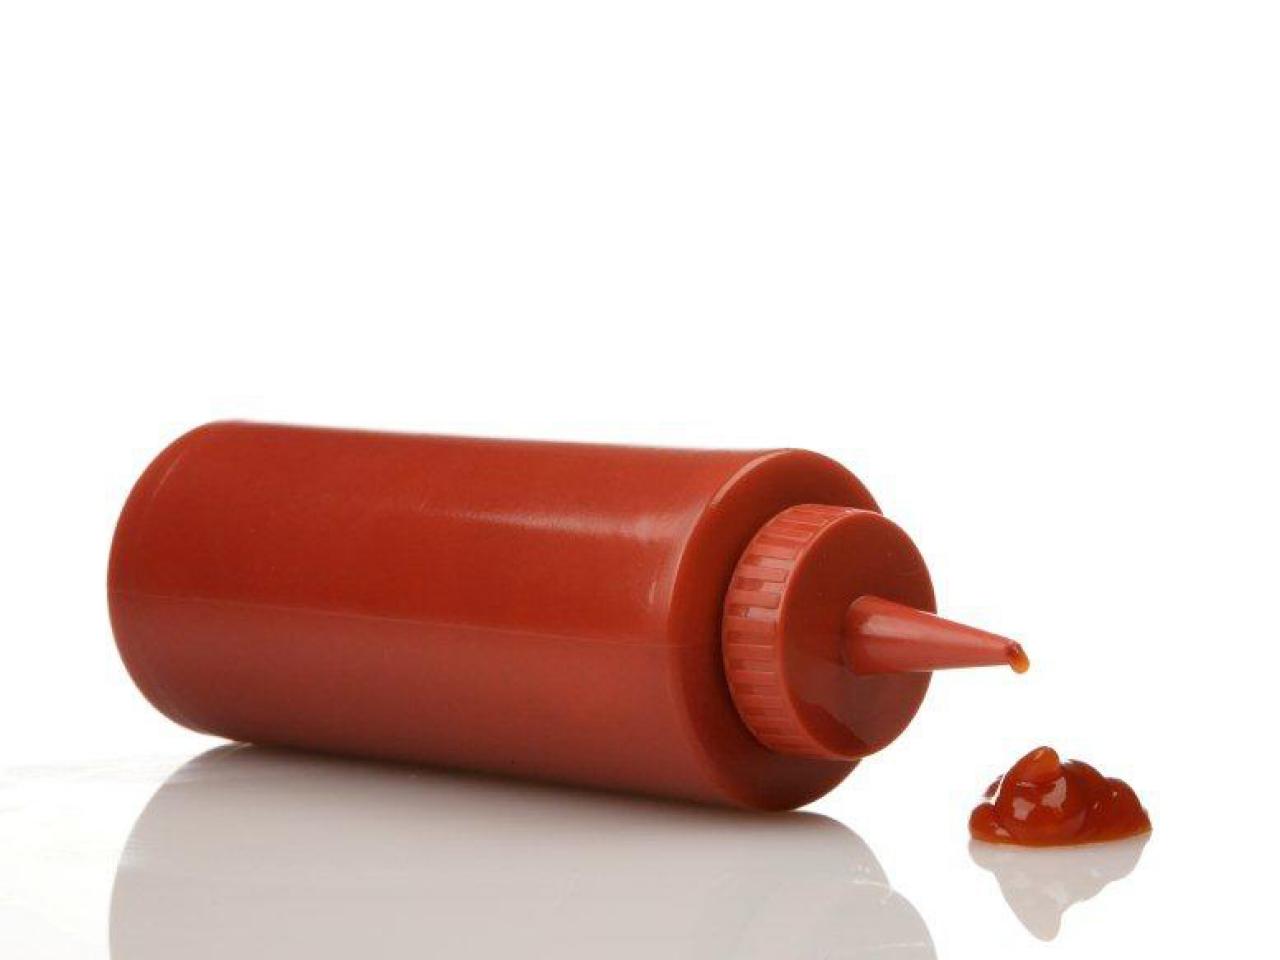


Tomatosauce.jpg


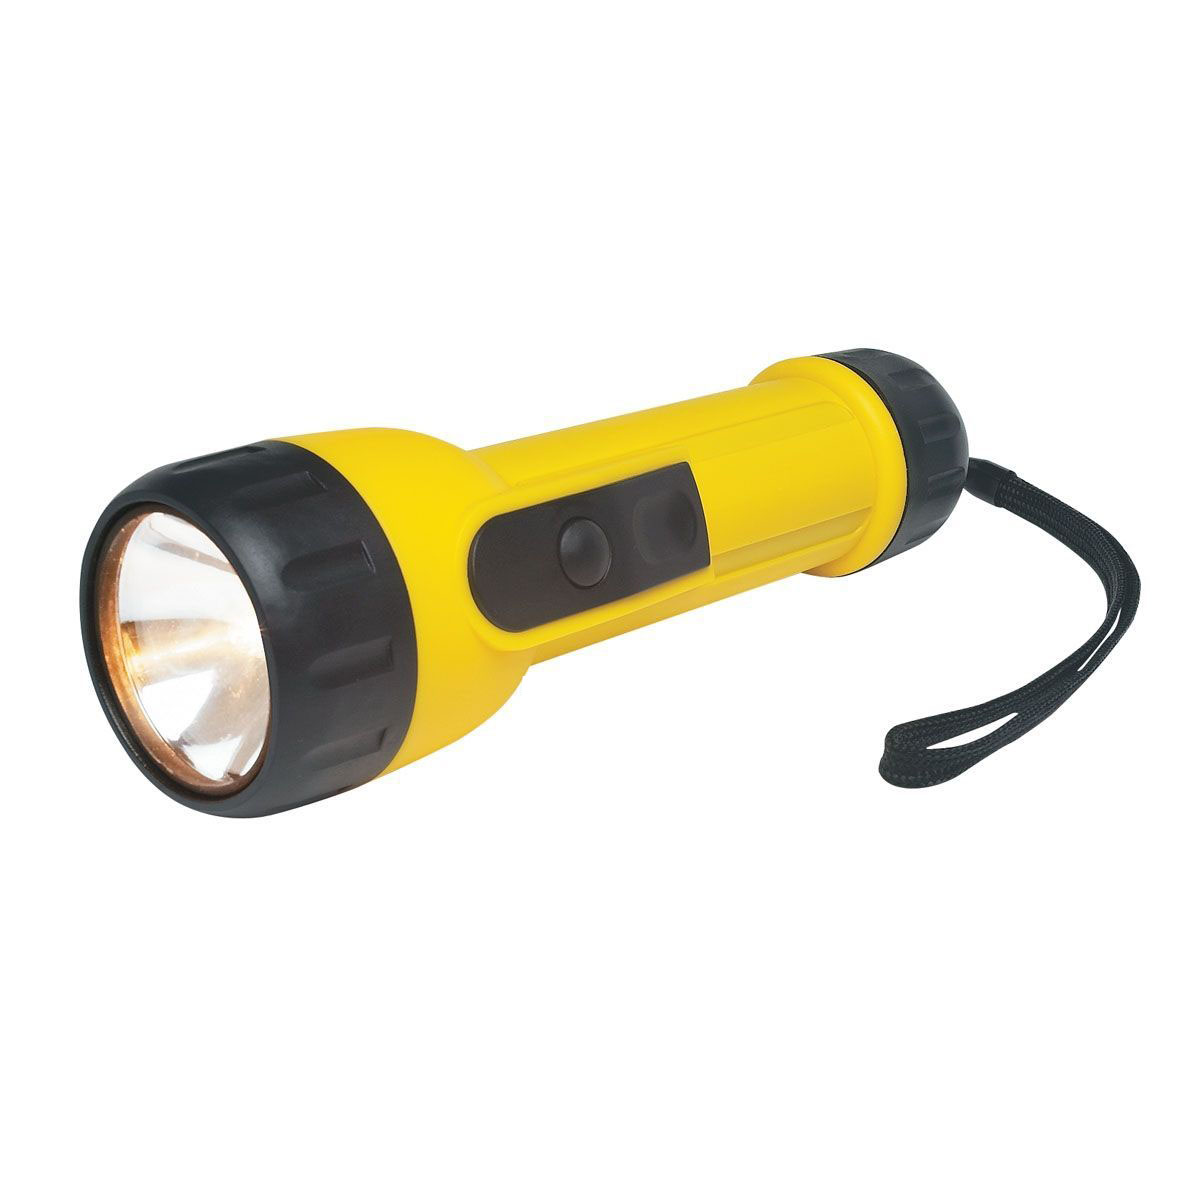


Torch.jpg


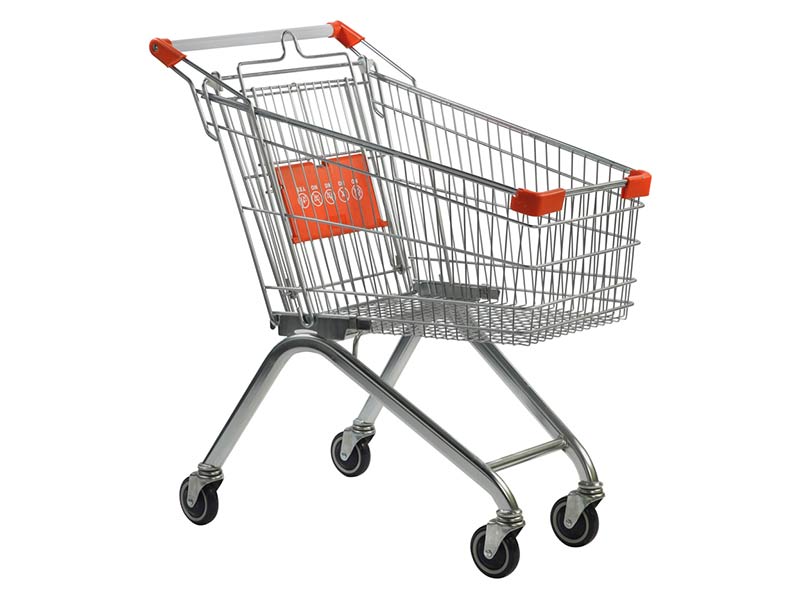


Trolley.jpg


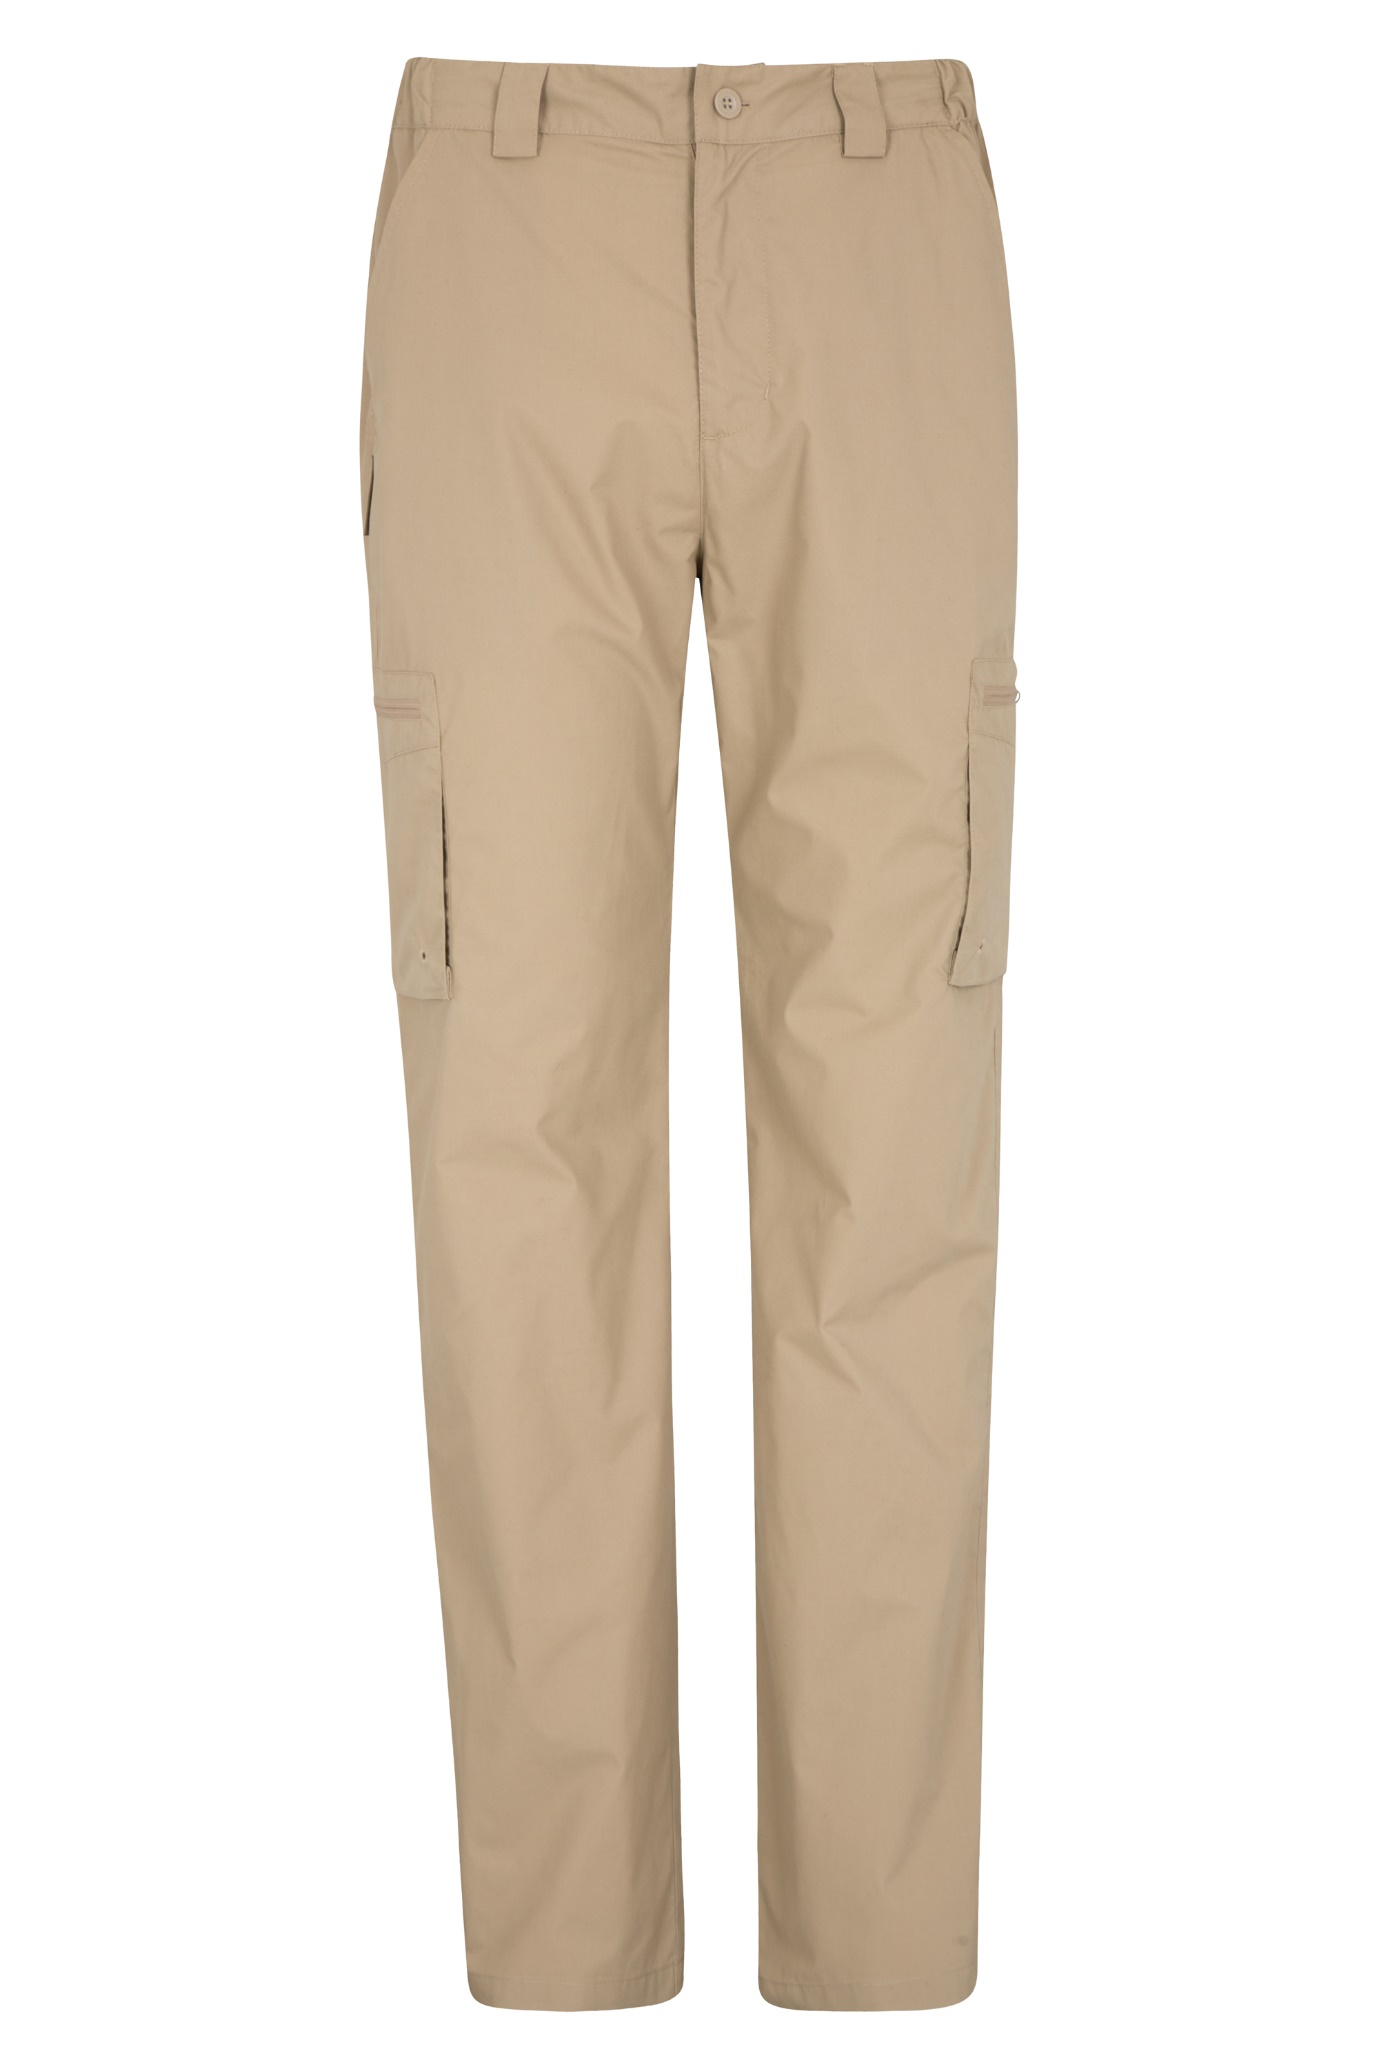


Trousers.jpg


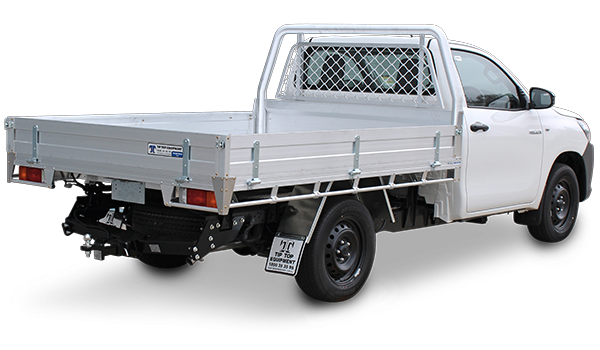


Ute.jpg


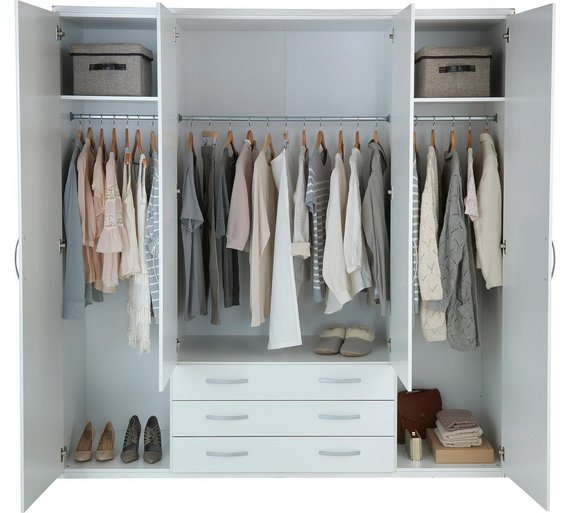


Wardrobe.jpg


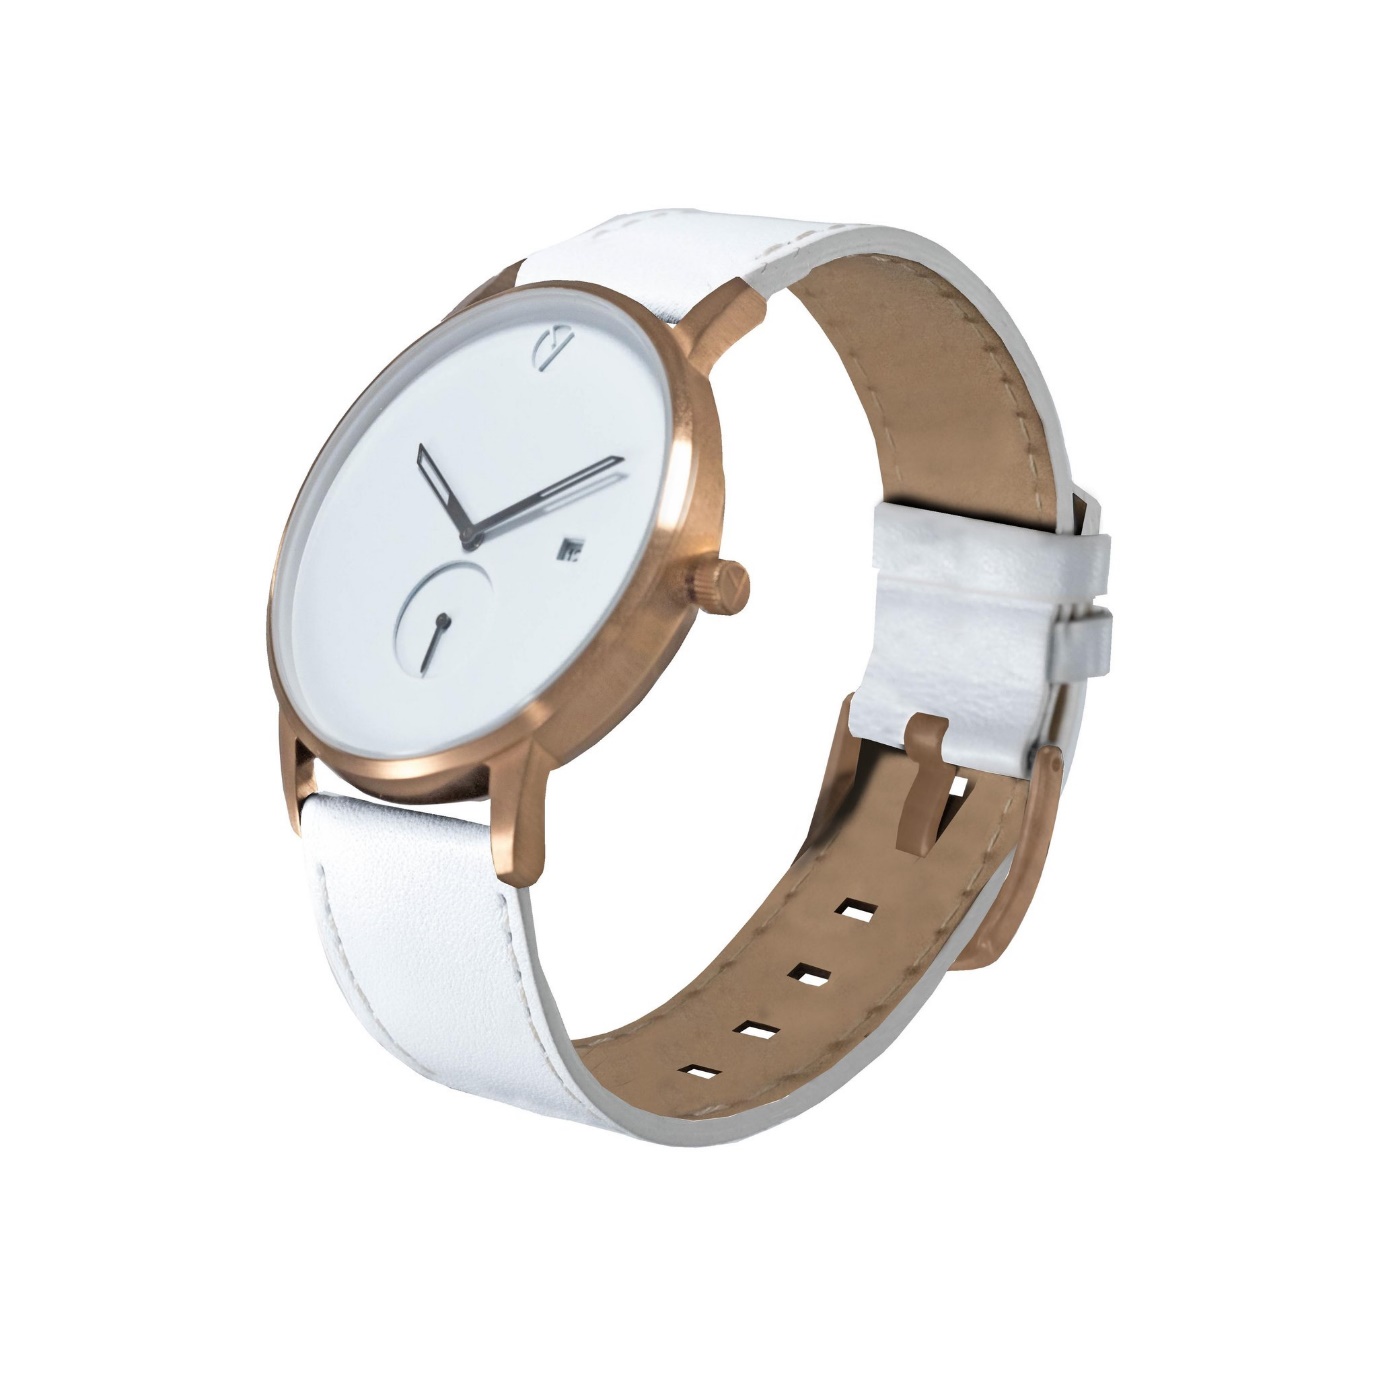


Watch.jpg


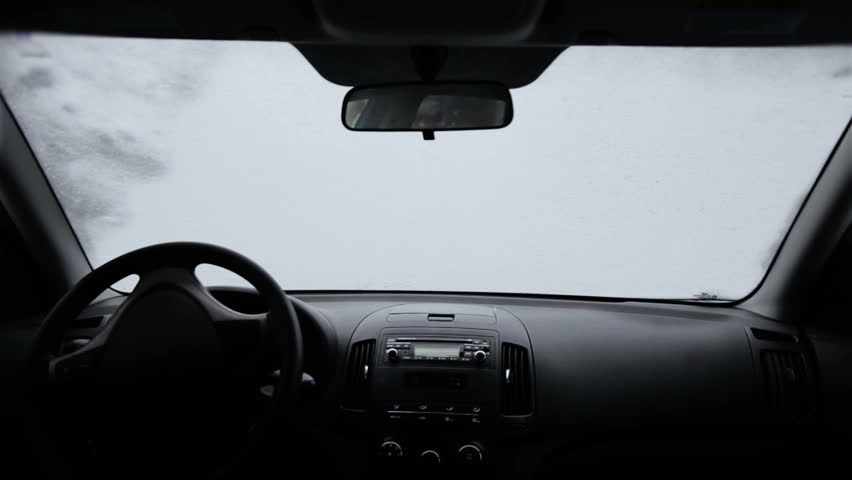


Windscreen.jpg
